## A novel *CBL-B<sup>flox/flox</sup>* mouse model allows tissue-selective fully conditional *CBL/CBL-B* double-knockout: CD4-Cre mediated *CBL/CBL-B* deletion occurs in both T-cells and hematopoietic stem cells

Benjamin Goetz<sup>1,\*</sup>, Wei An<sup>1,\*</sup>, Bhopal Mohapatra<sup>1,2,\*</sup>, Neha Zutshi<sup>1,3</sup>, Fany Iseka<sup>1,4</sup>, Matthew D. Storck<sup>1</sup>, Jane Meza<sup>6,7</sup>, Yuri Sheinin<sup>3,7</sup>, Vimla Band<sup>1,4,7</sup>, Hamid Band<sup>1,2,3,4,5,7</sup>

<sup>1</sup>Eppley Institute for Research in Cancer and Allied Diseases, University of Nebraska Medical Center, Omaha, NE 68198, USA

<sup>2</sup>Departments of Biochemistry and Molecular Biology, University of Nebraska Medical Center, Omaha, NE 68198, USA

<sup>3</sup>Department of Pathology and Microbiology, University of Nebraska Medical Center, Omaha, NE 68198, USA

<sup>4</sup>Department of Genetics, Cell Biology and Anatomy, University of Nebraska Medical Center, Omaha, NE 68198, USA

<sup>5</sup>Departments of Pharmacology and Experimental Neuroscience, College of Medicine, University of Nebraska Medical Center, Omaha, NE 68198, USA

<sup>6</sup>Department of Biostatistics, College of Public Health, University of Nebraska Medical Center, Omaha, NE 68198, USA

<sup>7</sup>Fred and Pamela Buffet Cancer Center, University of Nebraska Medical Center, Omaha, NE 68198, USA

\*Co-first authors, these authors contributed equally to this work

**Correspondence to:** Hamid Band, **email:** hband@unmc.edu

**Keywords:** *CBL-family ubiquitin ligases, T-cell, CD4, hematopoietic stem cell, conditional knockout*

**Received:** April 06, 2016

**Accepted:** May 10, 2016

**Published:** June 03, 2016

### ABSTRACT

**CBL-family ubiquitin ligases are critical negative regulators of tyrosine kinase signaling, with a clear redundancy between CBL and CBL-B evident in the immune cell and hematopoietic stem cell studies. Since CBL and CBL-B are negative regulators of immune cell activation, elimination of their function to boost immune cell activities could be beneficial in tumor immunotherapy. However, mutations of CBL are associated with human leukemias, pointing to tumor suppressor roles of CBL proteins; hence, it is critical to assess the tumor-intrinsic roles of CBL and CBL-B in cancers. This has not been possible since the only available whole-body CBL-B knockout mice exhibit constitutive tumor rejection. We engineered a new *CBL-B<sup>flox/flox</sup>* mouse, combined this with an existing *CBL<sup>flox/flox</sup>* mouse to generate *CBL<sup>flox/flox</sup>; CBL-B<sup>flox/flox</sup>* mice, and tested the tissue-specific concurrent deletion of CBL and CBL-B using the widely-used CD4-Cre transgenic allele to produce a T-cell-specific double knockout. Altered T-cell development, constitutive peripheral T-cell activation, and a lethal multi-organ immune infiltration phenotype largely resembling the previous Lck-Cre driven floxed-CBL deletion on a CBL-B knockout background establish the usefulness of the new model for tissue-specific CBL/CBL-B deletion. Unexpectedly, CD4-Cre-induced deletion in a small fraction of hematopoietic stem cells led to expansion of certain non-T-cell lineages, suggesting caution in the use of CD4-Cre for T-cell-restricted gene deletion. The establishment of a new model of concurrent tissue-selective CBL/CBL-B deletion should allow a clear assessment of the tumor-intrinsic roles of CBL/CBL-B in non-myeloid malignancies and help test the potential for CBL/CBL-B inactivation in immunotherapy of tumors.**

### INTRODUCTION

Tight regulation of T-cell activation and immunological tolerance are essential to allow the body to mount effective defense against foreign antigens and

to provide immune surveillance against cancer without evoking autoimmunity. A key mechanism to prevent autoimmune consequences of peripheral T-cell activation during immune responses is the imposition of a requirement for concurrent signals emanating from the T-cell receptor

(TCR) recognition of an antigen and those generated by the engagement of co-stimulatory molecules [1]. Engagement of the TCR in the absence of co-stimulatory molecules results in cell-intrinsic functional inactivation known as anergy [2]. During physiological immune responses, the function of co-stimulatory receptors and ligands is counter-balanced by negative co-stimulatory molecules on T-cells, such as CTLA4, and inhibitory ligands on APCs/target cells [1]. Recent work has established that active editing of immune mechanisms in tumors tilts this balance towards inhibitory rather than co-stimulatory signaling in T-cells, providing a major mechanism of immune escape used by tumors [3]. Indeed, antibody-based blockade of inhibitory pathways (e.g., anti-CTLA4) is emerging as a viable form of immunotherapy [4].

The CBL-family ubiquitin ligases (E3s) are essential negative regulators of T-cell activation and mediate induction of immune anergy/tolerance programs [5]. The CBL-family proteins function as E3s directed specifically at protein tyrosine-kinase (PTK) signaling pathways activated by stimulation through a number of cell surface receptors, including the TCR [6]. This function involves a highly conserved mechanism in which the N-terminal tyrosine kinase-binding (TKB) domain of CBL proteins binds to specific phosphotyrosine-containing motifs on receptor or non-receptor PTKs or adaptor proteins phosphorylated upon receptor-induced PTK activation [7]. Once recruited, CBL proteins are phosphorylated, which facilitate the binding of a ubiquitin conjugating enzyme (E2) and juxtaposes the E2 enzyme closer to the TKB domain-bound PTKs [8]. CBL and CBL-B, but not the epithelial-restricted CBL-C, also contain homologous C-terminal extensions that include an extensive proline-rich region and specific tyrosine phosphorylation sites for association with signaling proteins [9–11]. These mechanisms contribute to the negative regulation of PTK-coupled surface receptor signals that involve ubiquitination-dependent lysosomal targeting and/or proteasomal degradation of receptors and their associated signaling proteins [12–14].

Genetic studies using a whole-body CBL-B knockout mouse model demonstrate that CBL-B plays an essential role in coupling T-cell activation to the requirement for CD28-mediated co-stimulation [9, 15, 16]. In addition, CBL-B promotes destabilization of the immunological synapse by negatively regulating integrin activation [11]. CBL-B is also a critical regulator of the anergy induction program and becomes transcriptionally up-regulated under T-cell anergy-inducing conditions [17, 18]. As a result, CBL-B null mice exhibit increased susceptibility to spontaneous or induced autoimmunity [19]. Although CBL-B is expressed in immature thymocytes, CBL-B null mice show no detectable alterations in thymic development [15, 19].

CBL-B-null mice exhibit enhanced anti-tumor immunity in spontaneous and transplanted tumor models [5, 20]. However, the elucidation of mechanisms of enhanced anti-tumor ability in the currently-available CBL-B null mouse models has been challenging since all

immune and non-immune cells lack CBL-B expression. Adoptively-transferred CBL-B null CD8 T-cells or NK cells have been shown to exhibit an anti-tumor effect in mouse studies [21–24]. Based on these studies, downregulation of CBL-B in human T-cells has been shown to enhance their tumor killing abilities [25]. Recent studies suggest an increased expression of CBL-B within tumor-associated immune component, consistent with a role in mediating immune tolerance to tumors [26]. While these studies raise the prospect of inactivating CBL-B for immunotherapy of tumors, this has not received much consideration.

Whole-body CBL-null mice exhibit altered thymocyte development with increased thymocyte numbers and enhanced positive selection of mature CD4<sup>+</sup> T-cells [27]. While CBL<sup>-/-</sup> thymocytes exhibited hyper-activated ZAP70 and MAPK, curiously they also showed reduced activity of PI3K and PLC $\gamma$ 1, and impaired activation-induced TCR down-modulation [27, 28]. Even though CBL can interact with many of the same substrates as CBL-B, such as PI3K, Vav1 and CrkL, CBL-deficient mice display relatively normal peripheral T-cell function to the extent studied [29]. Thus, the *in vivo* function of CBL in peripheral T-cells remains incompletely characterized.

While CBL-B<sup>-/-</sup> mice display increased sensitivity to development of autoimmunity and CBL<sup>-/-</sup> mice show normal peripheral T-cell function, CBL/CBL-B double knockout is embryonic lethal and induction of Cre-mediated deletion of a floxed CBL allele by Lck-Cre (deletion at the double negative (DN) stage of thymocyte development) on a CBL-B null background led to severe spontaneous autoimmune organ infiltration, splenomegaly, and auto-antibodies leading to death between 12 and 16 weeks of age [30]. CBL and CBL-B double-deficient T-cells exhibit even higher proliferation compared to CBL-B<sup>-/-</sup> T-cells when stimulated with an anti-CD3 antibody. Combined deletion of CBL and CBL-B also leads to a more severely altered thymic development [31]. Aside from studies of T-cells, redundant functional roles of CBL and CBL-B have also emerged from a number of *in vitro* studies and genetic studies in other systems [32–35]. Deletion of floxed CBL with murine mammary tumor virus (MMTV)-Cre on a CBL-B null background led to a myeloproliferative disease due to CBL deletion in hematopoietic stem cells (HSCs), but such a phenotype was not observed when CBL alone or CBL-B alone were deleted [36, 37]. Using the same model, we have recently observed a redundant requirement of CBL and CBL-B in mammary gland development (Mohapatra B, Zutshi N, An W, Goetz B, Arya P, Bielecki T, Storck M, Meza J, Band V, Band H. An essential role of CBL and CBL-B ubiquitin ligases in mammary stem cell maintenance. submitted.).

In contrast to a potentially pro-oncogenic role of CBL proteins by promoting immune tolerance associated with tumorigenesis, a potentially opposite role of CBL proteins as tumor suppressors has emerged in the context of leukemogenesis. Mutations clustered in the linker region or RING finger domain of CBL, and rarely

CBL-B, which abrogate E3 activity, have been identified in a subset of patients with myelodysplastic syndrome/myeloproliferative neoplasms (MDS/MPN), chronic myelomonocytic leukemia or juvenile myelomonocytic leukemia [38–44]. Loss of CBL expression was shown to accelerate BCR-abl induced myeloid leukemogenesis in a mouse model [45]. Mice with an inactivating RING finger domain mutation in CBL also exhibit a leukemic disease when the WT CBL gene was deleted [46]. A more rapid leukemic disease was observed upon conditional CBL deletion, using MMTV-Cre, on a CBL-B null background thus supporting a redundant but essential role of CBL and CBL-B as tumor suppressors in the context of myeloid leukemogenesis [36, 37]. Whether or not CBL proteins have a role during tumorigenesis of non-myeloid lineages remains unknown; however, recent studies suggest a potentially pro-oncogenic role of CBL as its expression was found to be higher in breast cancer and depletion of CBL/CBL-B reduced tumorigenicity or metastasis of breast cancer cells in a nude mouse model [47, 48]. These suggestive findings make it vital to design models where tissue-specific and tumor-intrinsic deletion of CBL and/or CBL-B can be induced to assess non-myeloid cell and tumor cell-intrinsic roles of CBL proteins.

It is currently not feasible to test the functional redundancy of CBL proteins in specific populations of T-cells using existing models because their generalized CBL-B deficiency leads to altered and/or enhanced function of all T-cell subsets and other immune cells, including B cells [49], macrophages [50, 51], mast cells [52], neutrophils [53, 54], and NK cells [55]. Here, we describe the first CBL-B<sup>flox/flox</sup> mouse which allows conditional CBL and CBL-B deletion in a cell type-specific manner. By crossing this new mouse strain with the previously generated CBL<sup>flox/flox</sup> mouse and to a CD4-Cre transgen (Tg(Cd4-cre)1Cwi/BfluJ), we obtained concurrent CBL and CBL-B double knockout (DKO) in all T-cell subsets, resulting in altered T-cell development, widespread organ infiltration by immune cells and rapid lethality, consistent with a redundant functional role of CBL and CBL-B. Surprisingly, however, deletion of CBL and CBL-B was found to also occur in HSCs, resulting in their expansion and altered hematopoiesis, a result that brings into question the widespread use of CD4-Cre as driver of T-cell-specific gene deletion and suggests a cautious interpretation of studies with this Cre driver, especially in contexts where deletion results in loss of expression of a negative regulatory gene product.

## RESULTS

### Generation of CBL-B floxed mice

Since a regular knockout strategy targeting exons 1 and 2 of CBL-B gene is known to yield mice that completely lack CBL-B protein expression [15], we chose to target the same exons to generate CBL-B<sup>flox/flox</sup> mice as

described in the Materials and Methods section, using the CBL-B conditional knockout construct shown in Figure 1A. Successfully-targeted embryonic stem cell clones and chimeric mice were identified based on the generation of a 10 kb fragment in Southern Blots of *XmaI* digested genomic DNA (Figure 1B). Successfully-targeted founder mice were crossed with a Flp recombinase strain to help excise the Neomycin-resistance cassette. The heterozygous floxed mice were used to generate the CBL-B<sup>flox/flox</sup> mice whose genotype was confirmed by PCR, with the floxed allele generating a 750 bp fragment while the WT allele generates a 850 bp fragment (Figure 1C). To confirm that the inserted floxed sites were susceptible to Cre cleavage *in vivo*, we crossed these mice with an EIIA-Cre transgenic line and assessed the deletion of floxed CBL-B allele in germline by Western blotting of splenocytes demonstrating a complete loss of CBL-B protein expression similar to that seen with positive control CBL-B (-/-) splenocytes, while CBL-B protein expression in CBL-B<sup>flox/flox</sup> and WT mouse splenocytes was comparable (Figure 1D), excluding any negative impact of the introduced flox sites themselves on CBL-B expression.

To further verify the functional impact of CBL-B deletion in the new conditional CBL-B deletion model, splenocytes isolated from CBL-B<sup>flox/flox</sup>; EIIA-Cre mice were subjected to stimulation using an anti-CD3 antibody with or without an anti-CD28 antibody. It has been established that CBL-B-deficient T-cells secrete higher levels of IL-2 upon stimulation with an anti-CD3 antibody alone, or with an anti-CD3 plus anti-CD28 stimulation [15]. Indeed, anti-CD3 or anti-CD3 plus anti-CD28 stimulation induced higher levels of IL-2 production in CBL-B (-/-) T-cells from CBL-B<sup>flox/flox</sup>; EIIA-Cre mice similar to the increase in IL2 production seen using T-cells from conventional CBL-B (-/-) mice (Figure 1E and 1F). Collectively, these results establish that we have engineered a CBL-B<sup>flox/flox</sup> model that does not affect CBL-B expression in the absence of Cre-mediated gene deletion and is fully amenable to Cre-mediated gene deletion *in vivo*, recapitulating the functional impact of whole-body CBL-B deletion on T-cells previously reported [15].

### CD4-Cre induced CBL/CBL-B deletion leads to strong hematological phenotype

Previously, CBL/CBL-B double-KO in T-cells using Lck-Cre mediated deletion of CBL on a whole-body CBL-B KO was found to produce a spontaneous inflammatory disease that was eventually lethal (within 25 weeks of age), compared to a lack of inflammatory phenotype in the parental CBL-B-null mouse strain [15]. In our effort to examine the impact of T-cell specific, concurrent deletion of CBL and CBL-B, we generated CBL<sup>flox/flox</sup>; CBL-B<sup>flox/flox</sup> mice using the previously generated CBL<sup>flox/flox</sup> mice [30] and further crossed these to CD4-Cre transgenic mice to generate CBL<sup>flox/flox</sup>; CBL-

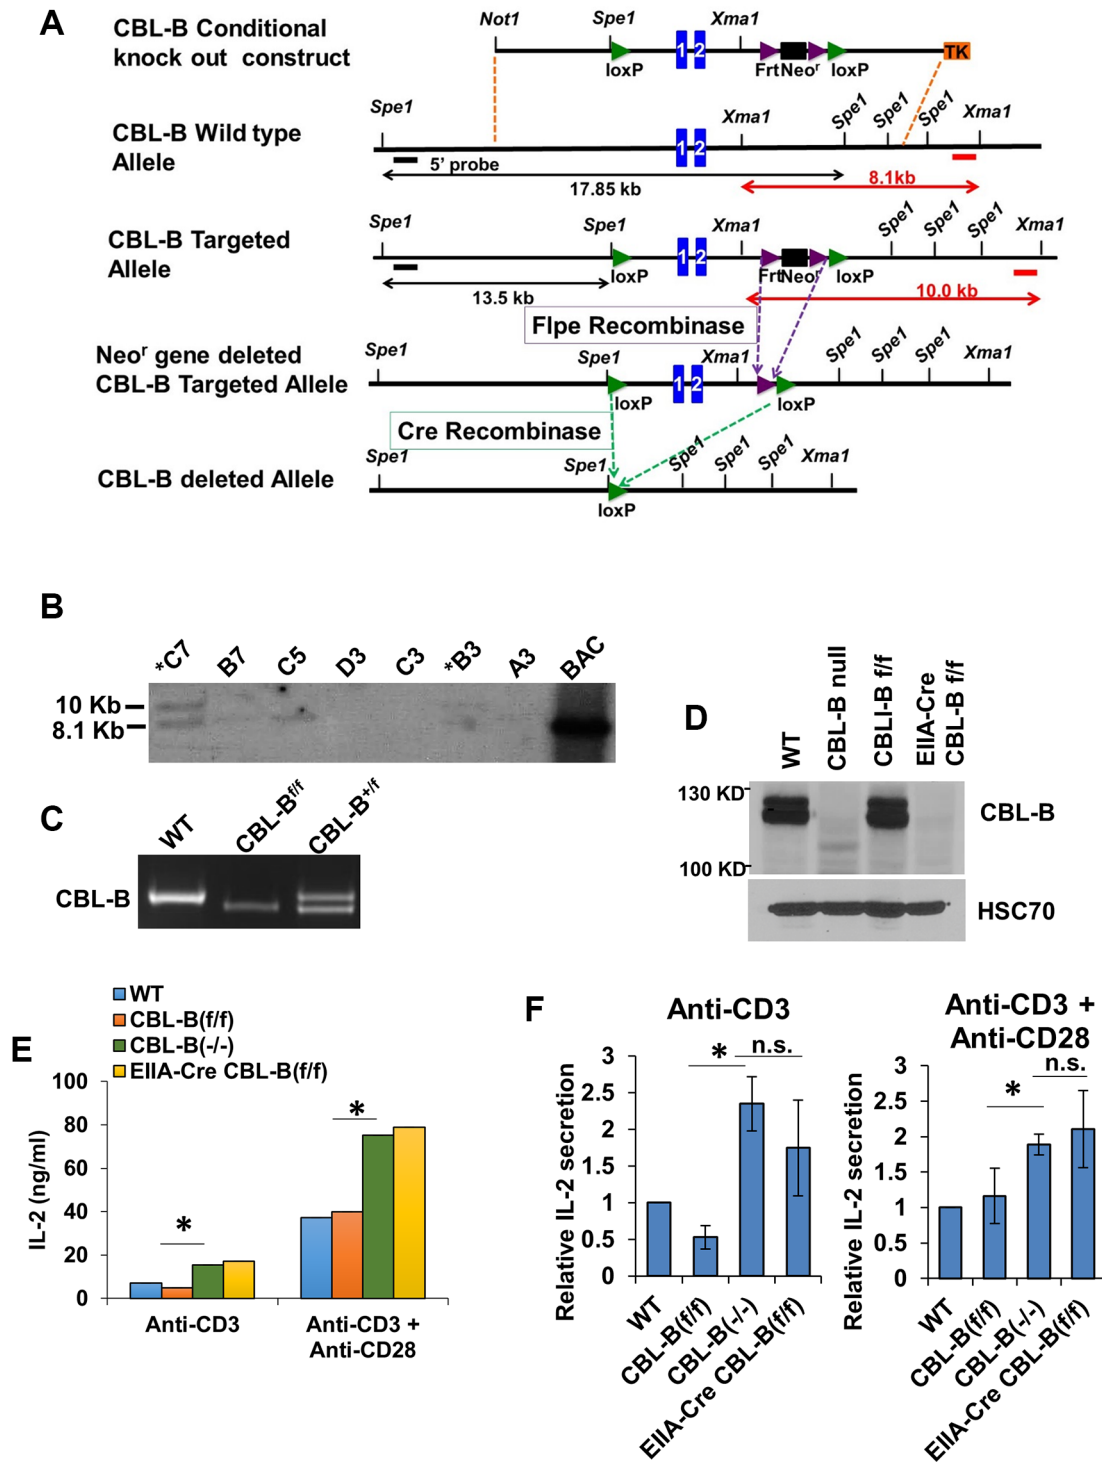

**Figure 1: Generation of the CBL-B floxed allele.** (A) Strategy for generating the CBL-B floxed targeting vector and CBL-B floxed (targeted) allele. Blue boxes represent exons. The 5' external probe for Southern Blotting is indicated by the thick black line and 3' external probe is displayed by thick red lines. The predicted length of Southern fragments is indicated with double arrow lines. (B) Targeted events were identified by Southern analysis of XmaI- digested genomic ES cell DNAs with a 3' flanking probe. There is a 1.9 KB insertion of the loxP-Frt cassette after proper targeting. B6 ES clones identified after southern blot. (C) Confirmation of the genotype of CBL-B floxed animals generated in our lab using allele-specific PCR primers detecting the floxed CBL-B allele correspond to the insert region containing the loxP site. (D) Western Blot validating the deletion of CBL-B in EIIA-Cre CBL-B floxed mice. Splenocytes were collected from mice with indicated genotype and total protein lysate were blotted for CBL-B and HSC70. (E-F) IL-2 ELISA. Splenocytes were collected from mice with indicated genotype and plated for 48 hours before medium were collected for IL-2 quantification. (E) is one representative experiment and (F) is pooled data from three experiment and shown as relative level normalized to WT control. Data shown are mean +/- SD. ns,  $p \geq 0.05$ ; \* $p \leq 0.05$ ; \*\* $p \leq 0.01$ ; \*\*\* $p \leq 0.001$ ; \*\*\*\* $p \leq 0.0001$ .

$B^{flox/flox}; CD4-Cre$  mice for conditional deletion of CBL and CBL-B specifically in T-cells (referred to as DKO mice hereafter). We also introduced a dual-reporter of Cre-mediated gene deletion in which Rose-26 locus encoded membrane-localized td-Tomato (red) and GFP that are expressed prior to and after successful Cre-mediated deletion of floxed sequence cassettes respectively [56]. This reporter system provided a handy tool to identify cells that have undergone Cre-mediated deletion (GFP+). FACS analysis identified a substantial increase in GFP expression in CD4+ cells of the spleen, and real-time PCR analysis verified the deletion of CBL and CBL-B in these cells (Figure 2A and 2B).

The  $CBL^{flox/flox}; CBL-B^{flox/flox}; CD4-Cre+$  (DKO) pups were born at expected Mendelian ratios (around 50% when crossed  $CBL^{flox/flox}; CBL-B^{flox/flox}$  with  $CBL^{flox/flox}; CBL-B^{flox/flox}; CD4-Cre+$ ). These mice however became moribund starting as early as 10 weeks of age and all became moribund and required euthanasia by 25 weeks (Figure 2C). Examination of 10-week old female DKO mice revealed the development of lymphomegaly and hepatosplenomegaly in all animals ( $n = 11$ ) (Figure 2D). Hematoxylin & Eosin staining of formalin-fixed and paraffin-embedded sections showed a high degree of immune cell infiltration in multiple organs examined (Figure 2E). Histological analysis revealed intense immune cell aggregates and features of extramedullary hematopoiesis in the liver, perivascular immune clusters in the kidney, perivascular immune aggregates and signs of acute and chronic inflammation in the lung, as well as perivascular immune clusters in the brain. Pathological changes observed in lymphoid tissues includes enlargement of follicle size and less defined white pulp in the spleen, and increased medullary area in lymph nodes. The histopathology of the heart and intestine were normal (data not shown). These data show that CD4-Cre directed CBL/CBL-B DKO leads to a severe and lethal spontaneous autoimmune/inflammatory phenotype.

### **CD4-Cre induced CBL/CBL-B DKO alters T-cell development and peripheral T-cell activation**

Since CBL family proteins are known to function as critical negative regulators of signaling in T-cells [14], we examined the effect of CD4-Cre induced DKO on T-cells within lymphoid tissues. 10-week old female DKO mice exhibited shrunken thymuses coincided with a marked reduction in the overall thymocyte numbers compared to control ( $CBL^{flox/flox}; CBL-B^{flox/flox}$  mice without CD4-Cre) mice (Figure 3A). Examination of different thymocyte subpopulations in DKO mice revealed a diminished CD4 and CD8 double-positive (DP) thymocyte population; however, there was an increase in the percentage of CD4/CD8 double-negative (DN) thymocytes and a substantial, albeit not statistically-significant (with the exception of CD4), skewing of the relative percentages and absolute

numbers of single-positive populations compared to control (Figure 3B and 3C). Compared to controls, the percentage of CD4+ thymocytes was modestly higher however this was not reflected in the overall CD4+ thymocyte numbers (Figure 3B and 3C). Further dissection of the DN population into DN1-4 subpopulations (based on the markers CD25, CD44, and CD117) [57] revealed an increase in DN4 population in DKO thymuses compared to control (Figure 3D). Altogether these data show that concurrent conditional deletion of CBL and CBL-B in T-cells using CD4-Cre leads to marked alterations in thymocyte development with a decrease in total double-positive thymocytes, an increase in double-negative thymocytes, and a skewing to CD4+ thymocyte proportions.

CBL/CBL-B deficiency in T-cells was previously shown to result in a constitutively-activated T-cell phenotype [15, 27, 30], as opposed to hyperactivity only upon extrinsic stimulation of T-cells in CBL-B-null mice [9, 15, 16]. To assess the impact of concurrent deletion of CBL/CBL-B in T-cells in CD4-Cre-bearing conditional DKO mice, we evaluated the activation status of peripheral T-cells in secondary lymphoid tissues. Compared to control, CD4+ and CD8+ T-cell populations contributed to a smaller percentage of the total splenic cells in DKO mice despite having overall greater numbers (Figure 4A and 4B). However, both CD4+ and CD8+ splenic T-cell populations in DKO mice exhibited lower levels of CD45RB and CD62L, as well as an increase in the ratio of cells positive for activation markers CD25, CD44 and CD69 as compared to control mice (Figure 4C and 4D). Examination of lymph node T-cell populations revealed a decrease in the percentage of CD4+ T-cells in DKO mice compared to control mice, similar to that seen in the spleen; however, the percentage of the CD8+ T-cell population appeared to be unchanged between control and DKO mice (Figure 5A and 5B). Also, similar to spleen, CD4+ and CD8+ T-cell populations in DKO lymph nodes showed a higher percentage of cells positive for activation markers compared to control mice (Figure 5C). Collectively, these findings lead to a clear conclusion that CD4-Cre induced concurrent CBL/CBL-B DKO leads to alleviation of negative regulatory mechanisms of T-cell activation resulting in constitutively-activated T-cells.

### **CD4-Cre directed CBL/CBL-B deletion in Non-T-cell lineages**

A dramatically-activated phenotype of T-cells in peripheral lymphoid tissues coupled with the result that CD4+ T-cells represented a smaller percentage of total cells in these tissues suggested the possibility that CD4-Cre induced DKO was associated with direct or indirect alterations in non-T-cell lineages. To investigate this possibility, we assessed the changes in the percentage and numbers of non-T hematopoietic lineage cells by FACS

Supplementary Figure S1. Spleen and lymph nodes were collected from control and DKO mice, and B cells and myeloid cells were evaluated. Compared to control mice, DKO splens showed an expansion of B cells and myeloid

cells, evidenced by an increase in the absolute numbers of cells carrying CD11b, CD11c, B220, F4/80 or Gr-1 (Figure 6A). Similarly, the Gr-1<sup>+</sup> population was also substantially, albeit not statistically significant, expanded in DKO lymph

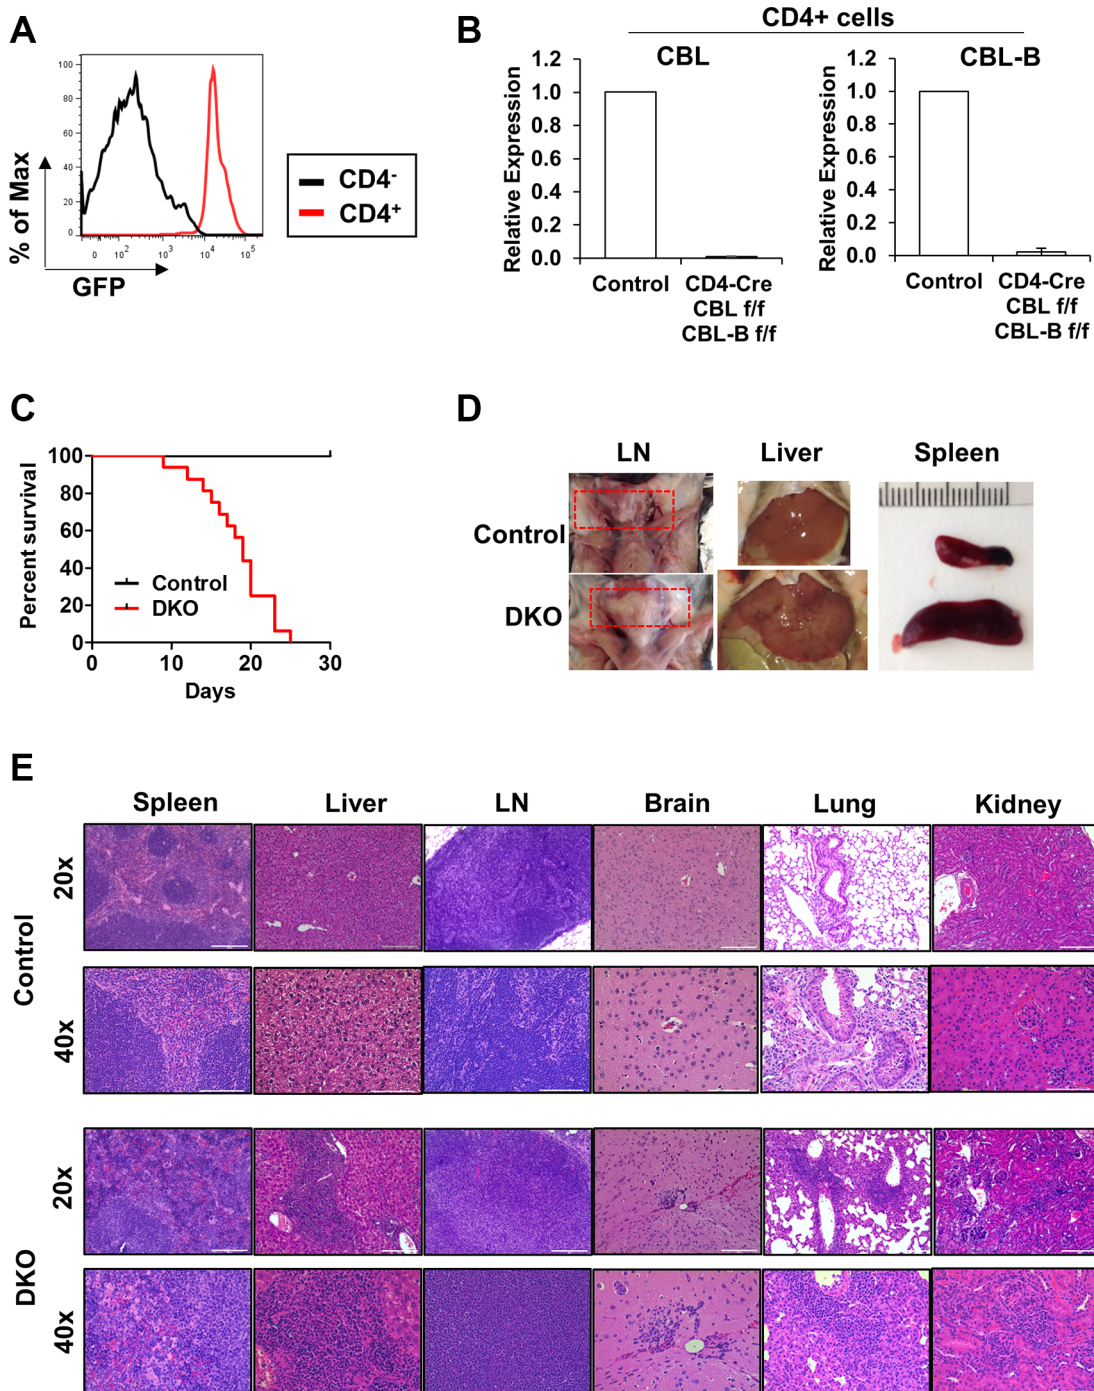

**Figure 2: CD4-Cre induced CBL/CBL-B deletion leads to strong hematological phenotype.** (A) FACS analysis of splenocytes from DKO mice for the expression of GFP in CD4<sup>+</sup> or CD4<sup>-</sup> cells. (B) mRNA expression levels of CBL (left) and CBL-B (right) were analyzed in FACS-sorted CD4<sup>+</sup> cells of Control or DKO mice by quantitative real-time PCR. (C) Kaplan-Meier survival curve of Control and DKO mice; *n* = 16. (D) Representative photos demonstrating lymph node hyperproliferation and hepatosplenomegaly. Red rectangle indicates lymph nodes (E) Representative H & E stained liver, spleen, lymph node (LN), brain, lung and kidney sections. Bar for 20× and 40× images represents 200 μm and 100 μm respectively.

nodes (Figure 6A). Peripheral blood differential cell counts further demonstrated a dramatic increase in myeloid cell populations in DKO mice compared to Control (Figure 6B).

To determine whether the alterations of non-T hematopoietic lineage cells was due to cell intrinsic loss of CBL/CBL-B or indirectly due to an effect of extrinsic signals from activated T-cells, we carried out FACS-based analysis of GFP reporter gene expression to assess if CD4-Cre induced gene deletion was confined to

T-cells as expected, or if non-T-cell lineages also showed evidence of gene deletion. As shown in Figure 6C, GFP was expressed in a majority of T-cells as anticipated; however, a subset of both B cells and myeloid populations were GFP+, indicative of unexpected deletion of CBL and CBL-B in non-T lineages.

Our results that CD4-Cre-mediated reporter gene deletion occurred in multiple non-T-cell lineages and myeloid cell proportion was increased in the peripheral

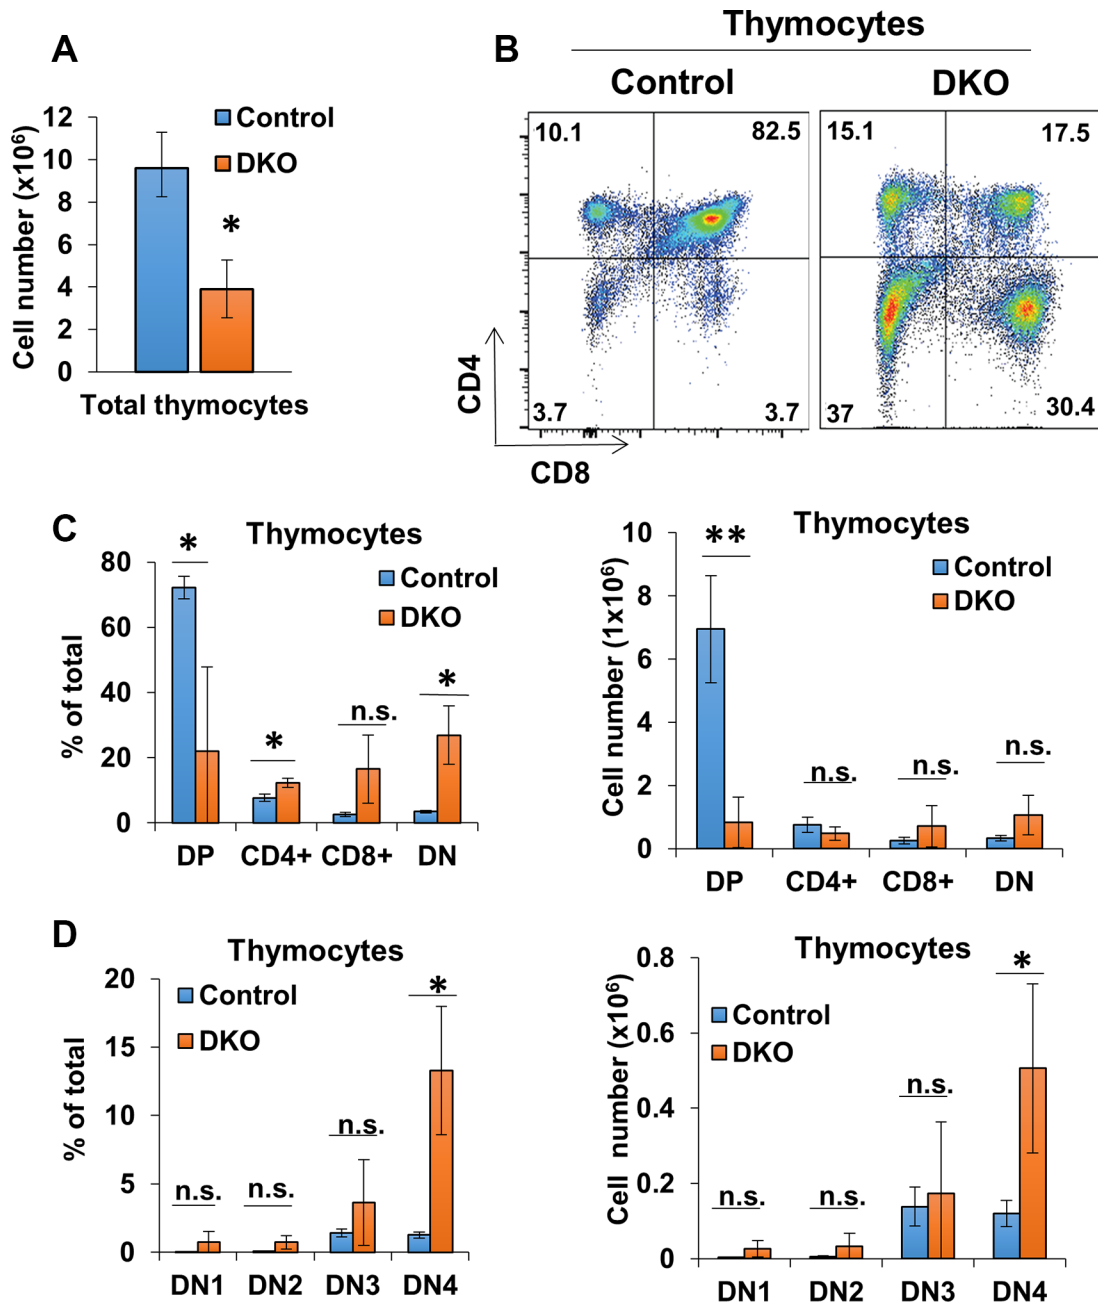

**Figure 3: CD4-Cre induced CBL/CBL-B deletion leads to altered thymocyte development.** (A) Mean values of cell numbers from thymuses of 10-week old Control and DKO mice;  $n = 3$ . (B) Representative dot plot FACS analysis of anti-CD4 and anti-CD8 stained thymocytes. (C) FACS analysis of CD4CD8 DP, single-positive, and DN thymocyte populations for percentage of total thymocytes (left) and cell number (right);  $n = 3$ . (D) Flow analysis of DN thymocyte populations for percentage of total thymocytes (left) and cell number (right);  $n = 3$ . DN cells are gated (DN1: CD117<sup>+</sup> CD44<sup>+</sup> CD25<sup>-</sup>, DN2: CD117<sup>+</sup> CD44<sup>+</sup> CD25<sup>+</sup>, DN3: CD117<sup>-</sup> CD44<sup>-</sup> CD25<sup>+</sup>, DN4: CD117<sup>-</sup> CD44<sup>-</sup> CD25<sup>-</sup>). Data shown are mean  $\pm$  SD. ns,  $p \geq 0.05$ ; \* $p \leq 0.05$ ; \*\* $p \leq 0.01$ ; \*\*\* $p \leq 0.001$ ; \*\*\*\* $p \leq 0.0001$ .

blood of mice rendered DKO using CD4-Cre suggests the possibility that CD4-Cre may concurrently direct CBL/CBL-B deletion either in these lineages or in HSCs since CBL/CBL-B deletion in HSCs using MMTV-Cre leads to a myeloid-skewed expansion [36, 37]. We therefore assessed whether CD4-Cre directed GFP reporter gene expression is observed in HSCs from which all hematopoietic lineage cells are derived [58]. To address this, we assessed the GFP expression of lineage marker-negative (Lin<sup>-</sup> cells; hematopoietic stem and progenitor cells) and Lin<sup>-</sup> sca-1<sup>+</sup> and c-Kit<sup>+</sup> (LSK cells; HSC-enriched population) cells isolated from the bone marrow of DKO mice using FACS. Notably, both Lin<sup>-</sup> and LSK populations in DKO mice contained a substantial subset of GFP<sup>+</sup> cells (Figure 6D) and real-time PCR analysis demonstrated an over 90% reduction in CBL and CBL-B expression in FACS sorted GFP<sup>+</sup> Lin<sup>-</sup> cells (Figure 6E). In addition, CD4-Cre induced CBL/CBL-B deletion leads to a significant expansion of long-term HSC (LT-HSC), short-term HSC (ST-HSC) and multipotent progenitors (MPP) cell populations compared to control mice (Figure 6F). This recapitulates the phenotype of mice with MMTV-Cre induced deletion of CBL and CBL-B in HSCs [36, 37].

These data lead us to conclude that CD4-Cre can direct gene deletion in a proportion of non-T hematopoietic lineages starting with the HSC stage.

### Expression of CD4 in HSC

CD4 is considered a T-cell marker and CD4 promoter elements have been used extensively in genetic studies to direct T-cell specific gene expression or deletion [59–68]. Given our results that CD4-Cre can direct gene deletion in HSCs, and old reports that a small proportion of HSCs express low levels of CD4 detectable with antibodies [69, 70], we next addressed if CD4 was indeed expressed in HSCs using a more sensitive quantitative real-time PCR (qPCR) assay (Figure 7A). HSCs (LSK cells) were sorted from WT BM cells and mRNA was analyzed for CD4 expression by qPCR, with T-cell specific CD3 [71] as a positive control for any T-cell contamination. Compared to the undetectable expression of CD3, a low but detectable level of CD4 mRNA expression was observed in HSCs, together with a detectable expression of Lck, a key signal transducer downstream of CD4 [72]. Furthermore, using WT BM cells from 3-week and 8 week old mice, we

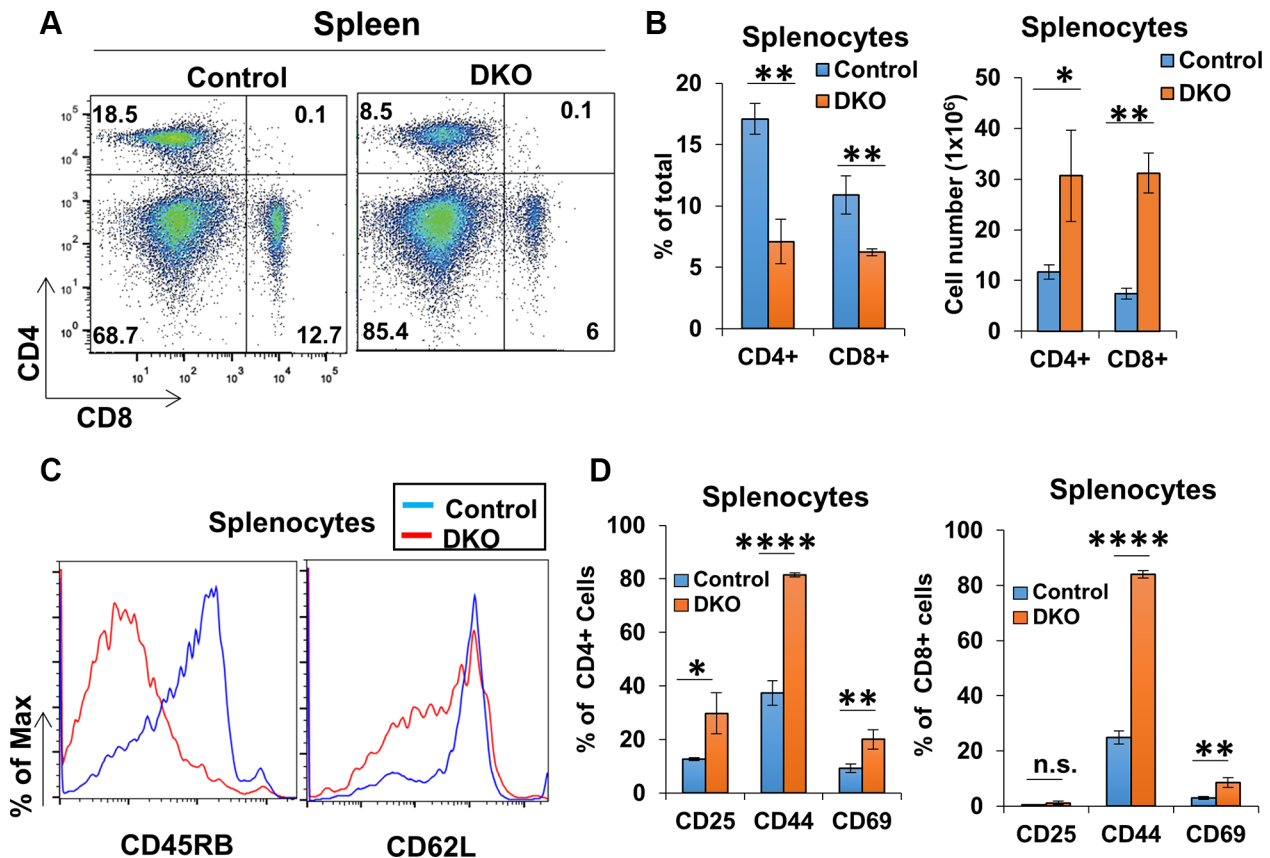

**Figure 4: CD4-Cre induced CBL/CBL-B deletion leads to altered splenic T-cell activation status.** (A–B) Representative FACS dot plots (A) and mean values of percentage of total splenic populations stained with anti-CD4 and anti-CD8 (B) in Control and DKO mice;  $n = 3$ . (C) Representative histograms for FACS analysis of marker expression for CD4<sup>+</sup> gated splenic population. (D) Quantification of the percentage of cells positive for markers CD25, CD44, and CD69 in splenic CD4<sup>+</sup> (left) and CD8<sup>+</sup> (right) gated populations;  $n = 3$ . Data shown are mean  $\pm$  SD. ns,  $p \geq 0.05$ ; \* $p \leq 0.05$ ; \*\* $p \leq 0.01$ ; \*\*\* $p \leq 0.001$ ; \*\*\*\* $p \leq 0.0001$ .



performed FACS analysis to evaluate the expression of CD4 on HSCs and hematopoietic progenitors (Figure 7B). Notably, compared to splenocytes (used as a positive control), LSK cells express an easily-detectable level of CD4 on the cell surface, consistent with previous reports [69, 70]. Collectively, these data suggest that CD4-Cre, by virtue of authentic expression of CD4 in a subset of HSCs and hematopoietic progenitors, can direct gene deletion in early hematopoietic lineages including HSCs, which can thereby add complexities to phenotypes assigned to T-cell specific gene deletion directed by CD4-Cre.

## DISCUSSION

CBL-family ubiquitin ligases are essential negative regulators of T-cell activation that impinge on anergy induction program. Tight regulation of T-cell activation and immunological tolerance are essential for effective defense against foreign antigens and immune surveillance against cancer without mounting autoimmunity to self-antigens or producing protracted inflammatory diseases

following infections. Previous models have failed to accurately elucidate the role that CBL proteins play in a T-cell-specific manner as these models utilized a CBL-B null background [13, 14], which leads to the altered and/or enhanced function of B cells [19], macrophages [20, 21], mast cells [22], neutrophils [23, 24], and NKT-cells [25]. Particularly in the context of tumorigenesis, the available CBL-B-null model has not been suitable for *in vivo* studies to assess the tumor cell-intrinsic roles of CBL proteins since CBL-B-null mice reject tumors due to their activated CD8+ T-cells [5, 23] and NK cells [24]. Studies described here describe the establishment and characterization of the first inducible model of CBL-B deletion. By crossing this new model to a previously established and sparingly-used CBL<sup>-flox/flox</sup> mouse, we have now established the first fully-conditional model of tissue-specific CBL/CBL-B DKO mouse model that will help overcome the current barrier in understanding the redundant roles of CBL proteins in physiological systems as well as in oncogenesis.

We established the functionality of the new floxed CBL-B alleles engineered in the mouse genome by

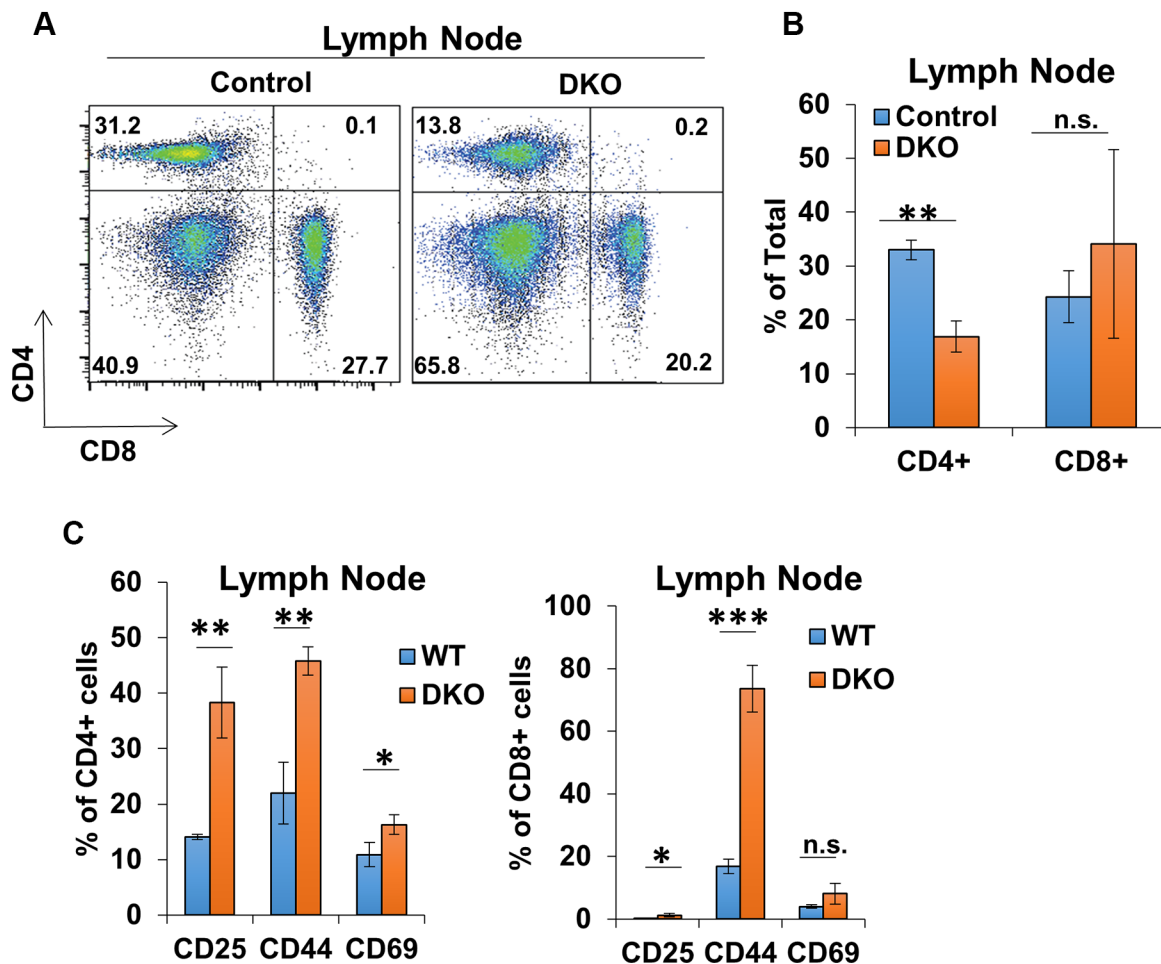

**Figure 5: CD4-Cre induced CBL/CBL-B deletion leads to altered T-cell phenotype in lymph nodes.** (A–B) Representative FACS dot plots (A) and mean values of percentage of total lymph node cells stained with anti-CD4 and anti-CD8 (B) in Control and DKO mice;  $n = 3$ . (C) Quantification of the percentage of cells positive for markers CD25, CD44, and CD69 in lymph node CD4<sup>+</sup> (left) and CD8<sup>+</sup> (right) gated populations;  $n = 3$ . Data shown are mean  $\pm$  SD. ns,  $p \geq 0.05$ ; \* $p \leq 0.05$ ; \*\* $p \leq 0.01$ ; \*\*\* $p \leq 0.001$ ; \*\*\*\* $p \leq 0.0001$ .

demonstrating the generation of a whole-body CBL-B null mouse by crossing the CBL-B floxed mice with EIIA-Cre transgene, which is known to drive Cre expression very early during development, including in germ cells [73]. Analyses of T-cells of these mice recapitulated the hyper-responsiveness to TCR engagement comparable to that seen using T-cells of previously generated whole-body KO mice [15] (Figures 4 and 5). As a proof of principle of tissue-specific concurrent deletion of CBL and CBL-B

in the CBL<sup>-*fl*/fl</sup>/CBL-B<sup>-*fl*/fl</sup> mice we generated, we chose to induce a DKO in T-cells since prior studies using Lck-Cre-driven deletion of CBL<sup>-*fl*/fl</sup> gene on a CBL-null background demonstrated that CBL and CBL-B function redundantly in T-cells and the DKO mice exhibit a profound and lethal inflammatory disease [30]. We used a CD4-Cre driver for these studies as this Cre has been extensively used for T-cell-specific deletion of conditionally-targeted genes [59–68]. CD4-Cre mediated DKO led to severe

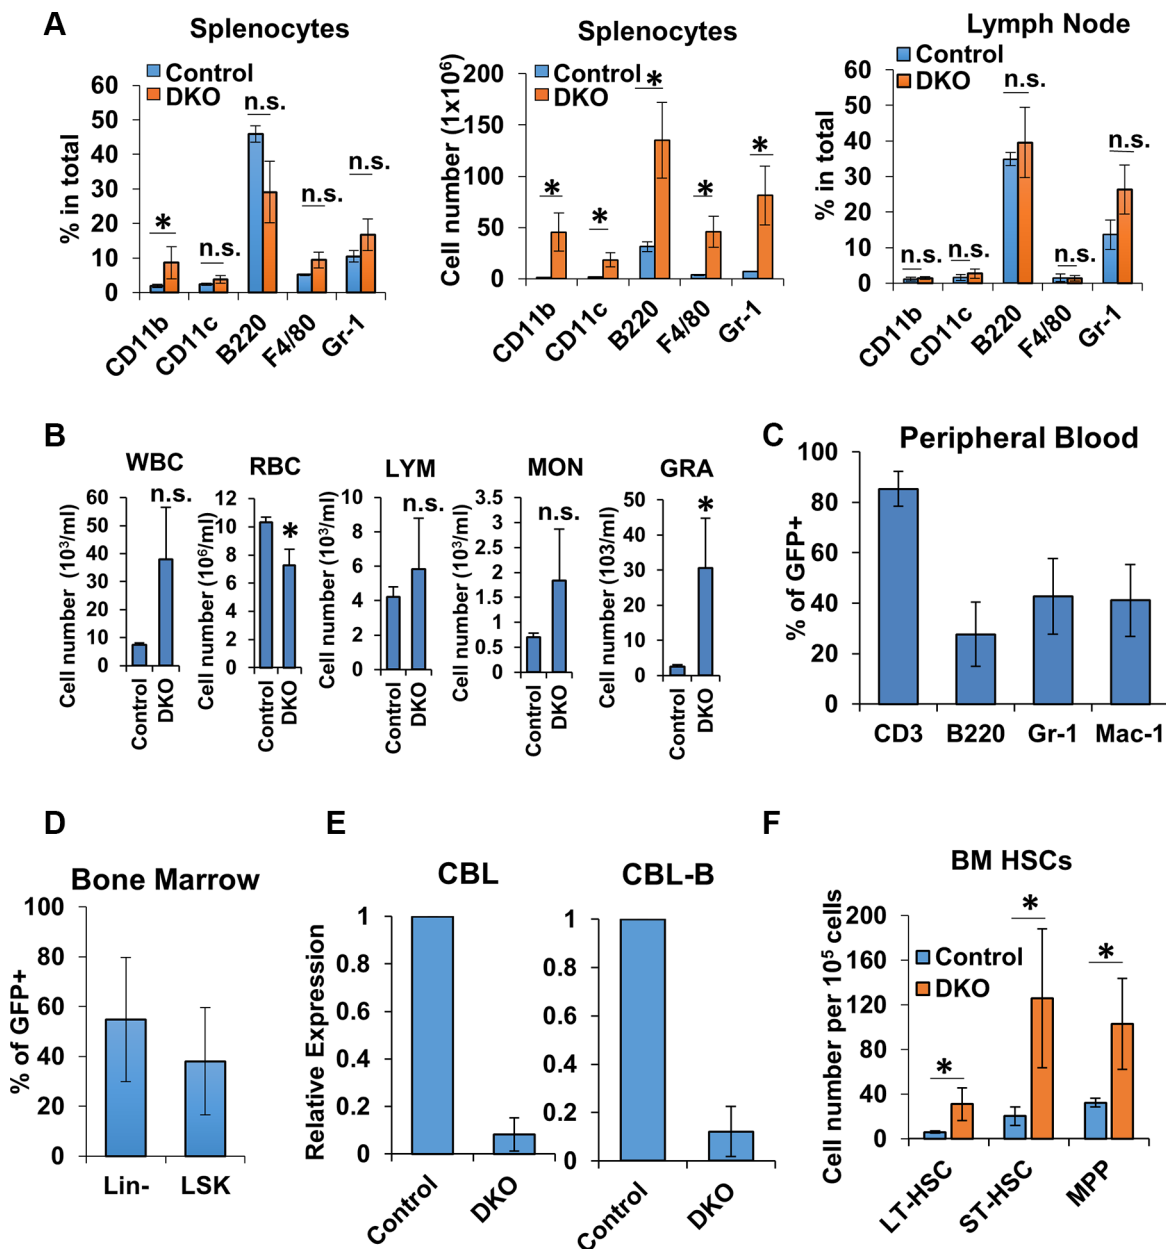

**Figure 6: Non-T-cells lineages were impacted by CD4-Cre.** (A) FACS analysis of spleen (left and center) and lymph node (right) from Control and DKO mice for non-T-cell markers;  $n = 3$ . (B–C) Peripheral blood cell counts (B) and FACS analysis for the expression of GFP (C) of Control and DKO mice;  $n = 3$ . WBC, white blood cell; LYM, lymphocyte; MON, monocyte; GRA, granulocyte; RBC, red blood cell. (D) FACS analysis of bone marrow Lin- and LSK cells from DKO mice for GFP expression. (E) mRNA expression levels of CBL (left) and CBL-B (right) were analyzed in FACS-sorted Lin- cells of Control or DKO mice by quantitative real-time PCR. (F) FACS analysis of bone marrow cells from Control and DKO mice HSCs (LT-HSC, ST-HSC and MPP). Data shown are mean  $\pm$  SD of at least 3 mice replicates. ns,  $p \geq 0.05$ ; \* $p \leq 0.05$ ; \*\* $p \leq 0.01$ ; \*\*\* $p \leq 0.001$ ; \*\*\*\* $p \leq 0.0001$ .

systemic, autoimmune/inflammatory disease with mice becoming moribund as early as 10 weeks of age accompanied by immune cell infiltration in multiple organs including liver, brain, kidney, and lung (Figure 2C, 2E). Notably, our findings differ from those of the previous T-cell DKO studies [30] in that we also observed immune cell infiltration in brain, kidney, and lung.

CD4-Cre expression is expected to begin at DP stage during thymic T-cell development [74]. While this is considerably later than that of Lck-Cre used in the previous studies, which is active as early as DN3 stage of double-negative thymocytes [31], T-cell development was altered in the CD4-Cre driven DKO mice with a reduction in total thymocyte numbers and skewing of thymocyte populations (Figure 3A–3D). These features and the increase in the DN4 thymocyte populations are similar to those seen in mice with Lck-Cre induced CBL deletion on a CBL-B-null background [31]. An impact on the DN4 populations is somewhat unexpected but consistent with the known role of CBL in negatively regulating the pre-TCR signaling [75]. This feature may be reflection of CD4-Cre mediated CBL/CBL-B deletion at earlier stages of hematopoiesis as discussed below. As demonstrated in previous work [31], decrease in the DP thymocyte

population can be attributed to alleviation of the negative regulation of TCR signaling, resulting in accentuation of TCR signal strength, which converts a positive into a negative T-cell selection.

We also show that CD4-Cre mediated deletion of CBL and CBL-B genes leads to constitutive activation of peripheral T-cell populations in the spleen and lymph node as demonstrated by the changes in the expression levels of activation-related markers (Figure 4C, 4D and Figure 5C). These data show that concurrent CBL and CBL-B deletion during T-cell development using CD4-Cre largely recapitulates the T-cell activation and systemic immune cell infiltration phenotype previously described, providing direct support that the new CBL-B-flox model and its combination with the existing CBL-flox model will allow controlled, tissue-specific deletion of CBL and/or CBL-B in specific cell types. Importantly, the newly-validated floxed models will allow, for the first time, a dissection of the specific as well as redundant roles of CBL and CBL-B to fully explore their roles in adult mammalian tissue function and pathology without the inherent developmental issues associated with the whole body CBL KO mice [76–78], immune hyperactivity of CBL-B-null mice [19], and importantly eliminate the

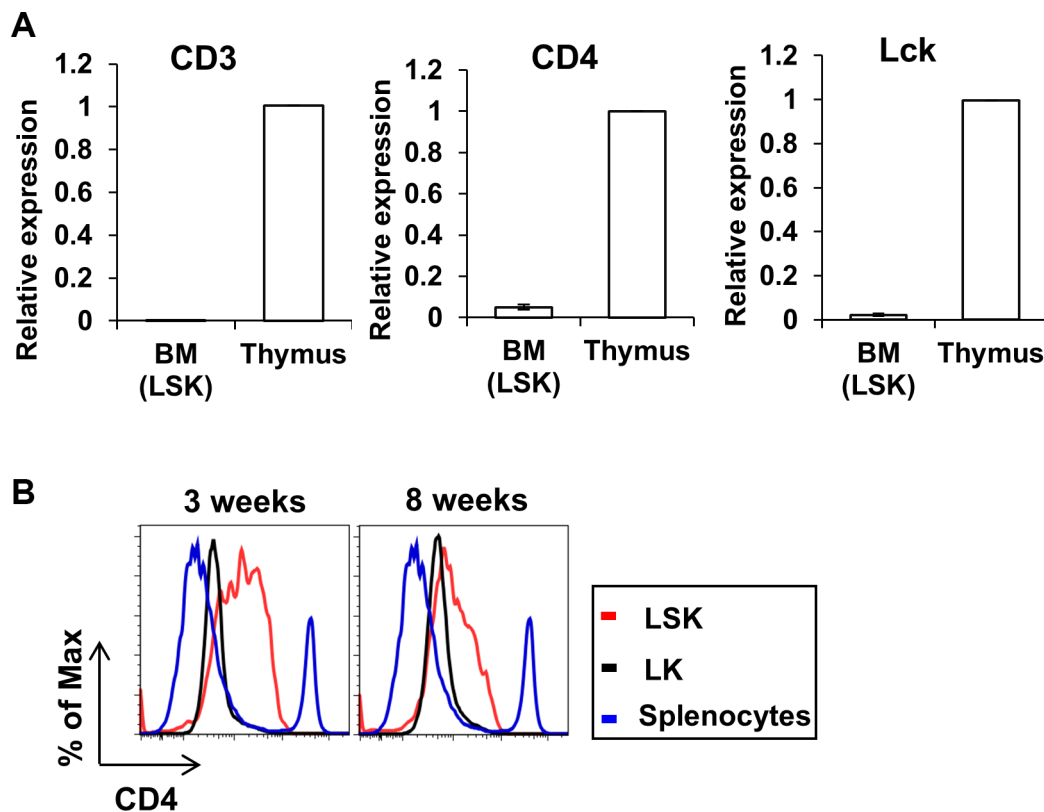

**Figure 7: Expression of CD4 in HSC.** (A) BM cells were collected from 3 weeks old WT mice and Lin<sup>-</sup> cells were FACS sorted followed by mRNA purification. Expression levels of CD3 (left), CD4 (center) and Lck (right) were analyzed by quantitative real-time PCR. Expression of target gene in Lin<sup>-</sup> cells is normalized to thymus control. Data show mean $\pm$ SD of 3 replicates. (B) BM cells were collected from 3 weeks (left) or 8 weeks (right) mice and labeled with stem cell markers and CD4. Splenocytes were used as positive control for the expression of CD4. Data shown is one representative data of three repeats.

issue of embryonic lethality of germline double KO mice. Importantly, this model will allow concurrent CBL and CBL-B deletion in non-hematopoietic tissues to understand the role of these proteins in physiology and tumorigenesis, without spontaneous tumor rejection.

While deletion of CBL and CBL-B in T-cells (Figure 2A, 2B) was expected, the alteration of DN thymocyte populations, a more aggressive phenotype of CD4-Cre mediated DKO mice compared to that of previously described Lck-Cre driven DKO [30], and a marked decrease in the relative proportions of peripheral CD4+ T-cells suggested that CD4-Cre driven CBL/CBL-B DKO may also occur in other hematopoietic lineages, a possibility not considered in previous studies. Indeed, we demonstrated that CBL and CBL-B deletion was present in other hematopoietic lineages (Figure 6A). Given our previous studies in which MMTV-driven deletion of CBL in a small percentage of HSCs led to a myeloid-skewed expansion of peripheral blood cell lineages and HSC expansion [36, 37], one possible explanation for these discrepancies was that CBL and CBL-B are deleted in a certain proportion of HSCs, which consequently manifests as CBL/CBL-B deletion in other non-intended lineages within the hematopoietic system. This notion is consistent with previous reports, which have received little attention in the context of the use of CD4-Cre for gene deletion in which CD4 expression was shown on a small subset of HSCs using antibody-based staining [69, 70]. We provide further support for this idea using real-time PCR and FACS analysis demonstrating the expression of the Cre reporter (GFP) in HSCs as well as differentiated hematopoietic cell populations (Figure 6C, 6D, 6E). CD3, a marker of T-lineage cells was not detectable in HSCs, reducing the likelihood of the CD4 signals arising from any lingering T-cell contamination in our LSK population. Moreover, the Lin- Sca-1- c-Kit+ (LK) population, which represents the more committed myeloid progenitor population [58], exhibited a lower level of CD4 expression level (Figure 7B) compared to LSK cells, suggesting that CD4 expression in immature hematopoietic stem/progenitors is a transient event.

The role of CD4 expression in HSCs is unclear. The likely explanation for why a potentially-transient CD4-Cre directed deletion of CBL and CBL-B in a small percentage of HSCs would manifest more strongly in our studies is that HSCs with loss of CBL and CBL-B acquire a robust proliferative advantage, as has been demonstrated in previous studies [36, 37, 79]. The apparent lack of any robust HSC-based phenotype in previous studies [59–68] could reflect a lack of consideration of such a phenotype due to lack of a proliferative advantage of the targeted gene deletion or a negative impact on proliferation. Regardless of the role of CD4 in HSCs, our results suggest caution in designing CD4-Cre based deletion strategies and assigning the phenotypes solely to gene deletion in T-cells.

Overall, our studies establish a new model of inducible CBL/CBL-B deletion that should allow the immune vs. non-immune cell-intrinsic roles of these key but functionally redundant negative regulators of tyrosine kinase signaling to be determined. Further, for the first time, the new model will allow the role of CBL and CBL-B to be determined in tumorigenesis without the current lack of feasibility of such studies due to tumor rejection from germline deletion of CBL-B using existing models.

## MATERIALS AND METHODS

### Mice

In order to generate CBL-B conditional knockout mice, a CBL-B conditional knockout construct was engineered using “recombineering” technique (Figure 1A) [80]. The Clone Finder software (NCBI database) was used to search the NIH’s C57BL/6J (B6) mouse BAC library (at the Children’s Hospital Oakland Research Institute). We identified clones [RP23-456D16, RP23-122H13, RP24-361F9, RP24-98B21] that contain the mouse CBL-B gene. A series of “recombineering” reactions [80] were used to retrieve a 10.5 kb fragment of the BAC DNA containing the first and second exons of CBL-B into a plasmid (with negative selection marker), allowing us to introduce two loxP (Cre recombinase recognition) sites flanking this region. Immediately preceding the second loxP site an engineered FRT-Neo-FRT selection cassette was inserted which confers G418 resistance to transfected ES cells. FRT sites allow removal of the Neo gene using FLP recombinase thus keeping alterations of the gene locus to a minimum. The correct arrangement and sequence of targeted gene segments at each step have been verified by PCR analysis and sequencing. A NotI linearized targeting vector was submitted to the Mouse Genome Engineering Core Facility at UNMC for electroporation into a C57BL/6-derived ES cell line. Southern blot hybridization with probes located outside the 5’ and 3’ boundaries of the targeted region was used for screening of 5’ and 3’ boundaries of the targeted region to identify targeted ES clones after G418 and guanyclovir selection.

C57BL/6 ES clones in which the CBL-B gene was correctly targeted were used to produce chimeric mice using blastocyst injection. Chimeras were mated to B6 mice to test the germline transmission of the targeted CBL-B allele and verified using Southern blot hybridization and PCR analysis of tail-derived genomic DNA.

Next, heterozygous CBL-B targeted mice (CBL-B<sup>f-Neo/+</sup>) were intercrossed to generate homozygous CBL-B targeted mice (CBL-B<sup>f-Neo/f-Neo</sup>). The homozygous CBL-B targeted mice were mated to B6; SJLTg(ACTFLPe)9205Dym/J mice which express the enhanced FLP1 recombinase (FLPe) from the ubiquitously expressed human ACTB (beta actin) promoter to remove

the FRT-flanked Neo gene. Heterozygous CBL-B targeted, FLPe transgene-positive mice were crossed to C57BL/6J (wild-type mice) in order to generate heterozygous CBL-B-floxed, FLPe transgene-negative (*CBL-B<sup>fl/+</sup>*) mice. These heterozygous mice were mated to produce homozygous CBL-B floxed mice (*CBL-B<sup>fl/fl</sup>*). To examine the functionality of the loxP site in the engineered mice and generate CBL-B null mice, we crossed the CBL-B floxed mice to B6.FVB-TgN (EIIa-Cre) C5379Lmgd, which expresses Cre ubiquitously from the EIIa promoter. Heterozygous *CBL-B*-targeted, EIIa-Cre transgene-positive mice were crossed to C57BL/6J (wild-type) mice to generate heterozygous *CBL-B*-deleted, Cre transgene-negative (*CBL-B<sup>-/-</sup>*) mice, which were used to produce *CBL-B<sup>-/-</sup>* mice.

*CBL<sup>flox/flox</sup>* [30], *CBL-B<sup>flox/flox</sup>*, CD4-Cre [Tg(Cd4-cre)1Cwi/BfluJ] (The Jackson Laboratory), and Cre mT/mGFP reporter [Gt(ROSA)26Sortm4(ACTB-tdTomato,-EGFP)Luo/J] (The Jackson Laboratory) strains were maintained on a C57/B16 background under specific pathogen-free conditions (Supplementary Table 1) and genotyped using tail DNA PCR with the primers specified in (Supplementary Table 2). All mouse experiments were approved by the UNMC IACUC.

### Tissue preparation and FACS analysis

Single cell suspensions were made from spleen, thymus, and lymph node by mashing tissue through a 40 µm cell strainer and RBCs were lysed using ACK Lysing Buffer for 10 min at RT. For cell analysis and sorting, cells were immuno-stained for 20 min at 4°C in FACS buffer (PBS-1% BSA). The following antibodies were procured from eBioscience: CD4 (RM4-5); CD62L (MEL-14); CD45RB (C363.16A); CD69 (H1.2F3); B220 (RA3-6B2); F4/80 (BM8). The following antibodies were procured from BD Biosciences: CD8 (53-6.7); CD117 (2B8); CD11b (M1/70); anti-CD11c (HL3); Gr-1 (RB6-8C5). CD25 (PC61) and CD44 (IM7) were from Biolegend.

Whole bone marrow cell suspensions were prepared from femurs and tibiae. For stem and progenitor cell analysis and sorting, mature hematopoietic cells (lineage-positive cells) were labeled with antibodies against CD5, B220, CD11b, Gr-1, and 7-4 (mouse lineage depletion kit; Miltenyi Biotechnology) and magnetically depleted using the autoMACS (Miltenyi Biotechnology). Lineage-negative cells were then stained with antibodies followed by cell analysis or sorting. Flow cytometry was performed on a BD LSR II or Aria II at the UNMC Flow Cytometry Research Facility. Data were analyzed using FlowJo software (Tree Star). Cell populations were defined as follows [81] LT-HSC: CD34<sup>+</sup> FLT3<sup>-</sup> Lin<sup>-</sup> Sca-1<sup>+</sup> c-Kit<sup>+</sup>; ST-HSC: CD34<sup>+</sup> FLT3<sup>-</sup> Lin<sup>-</sup> Sca-1<sup>+</sup> c-Kit<sup>+</sup>; MPP: CD34<sup>+</sup> FLT3<sup>+</sup> Lin<sup>-</sup> Sca-1<sup>+</sup> c-Kit<sup>+</sup>; LSK: Lin<sup>-</sup> Sca-1<sup>+</sup> c-Kit<sup>+</sup>; CMP: CD16<sup>-</sup> CD34<sup>+</sup> Lin<sup>-</sup> Sca-1<sup>-</sup> c-Kit<sup>+</sup>; GMP: CD16<sup>+</sup> CD34<sup>+</sup> Lin<sup>-</sup> Sca-1<sup>-</sup> c-Kit<sup>+</sup>; MEP: CD16<sup>-</sup> CD34<sup>+</sup> Lin<sup>-</sup> Sca-1<sup>-</sup> c-Kit<sup>+</sup>; CLP: IL-7R<sup>+</sup> FLT3<sup>+</sup> Lin<sup>-</sup> Sca-1<sup>low</sup> c-Kit<sup>low</sup>.

### Western blotting

For CBL-B protein expression analysis, splenocytes were lysed using lysis buffer (1 M Tris pH 7.5, 5 M NaCl, 10% Triton, 100 mM VO<sub>4</sub>, 1 M NaF, 50 mM PMSF). The following antibodies for western blotting were procured from commercial sources: Rabbit monoclonal antibody (mAb) anti-CBL-B (Clone D3C12, Cell Signaling Technology).

### ELISA

Splenocytes were cultured in RPMI supplemented with 10% FBS in triplicates in 96 U-bottom wells (2 × 10<sup>6</sup> cells/well) precoated with 10 µg/ml plate-bound anti-CD3ε (145-2C11) in the presence or absence of 1 µg/ml soluble anti-CD28 (37.51) for 48 h at 37°C. Culture supernatants were collected and the IL-2 concentration measured by Quantikine ELISA kit (R&D systems), according to the manufacturer's instructions.

### RNA isolation and quantitative real-time PCR analysis

RNA extracted from FACS-sorted cells (RNAqueous-Micro kit, Life Technologies) was reverse-transcribed (QuantiTect kit, Qiagen) and subjected to quantitative real-time PCR (QuantiTect SYBR Green Kit, Qiagen) on a BioRad CFX96 thermocycler, following the manufacturer's instructions. Primers are listed in Supplementary Table 3.

### Histopathology

Organs were formalin-fixed, dehydrated in 70% EtOH, paraffin-embedded and H&E stained. Whole blood CBCs were performed on a Scil Vet abc Animal Blood Counter (Scil Animal Care).

### Statistics

Quantified results of qPCR and flow cytometry were compared between groups using Student's *t* test, and are presented as mean ± SD, with *p* ≤ 0.05 deemed significant. Statistical analysis and graphical representation of data were performed using GraphPad Prism version 4.0c (GraphPad Software, San Diego, CA). Data shown are mean ± SD. ns, *p* ≥ 0.05; \**p* ≤ 0.05; \*\**p* ≤ 0.01; \*\*\**p* ≤ 0.001; \*\*\*\**p* ≤ 0.0001.

### ACKNOWLEDGMENTS

We thank the Band Lab members for discussion, UNMC Flow Cytometry, Histology and Comparative Medicine Core staff for assistance and Dr. Kay-Uwe Wagner for use of cell analyzer.

## CONFLICTS OF INTEREST

All authors disclose no conflicts of interest.

## GRANT SUPPORT

NIH grants CA87986, CA105489, CA99163 and CA116552 to HB, CA105489-supplement (FI) and CA96844 and CA144027 to VB; Department of Defense grants W81XWH-07-1-0351 and W81XWH-11-1-0171 (VB); the NE DHHS LB-506 (2014-01) and LB606 (18123-Y3) grants (HB); Institutional Development Award (IDeA) from the NIGMS of the NIH under grant number P30 GM106397; and support to the UNMC Confocal, Flow Cytometry and other Core facilities from the NCI Cancer Center Support Grant (P30CA036727) to Fred & Pamela Buffett Cancer Center and the Nebraska Research Initiative. BG was a trainee under the NCI Cancer Biology Training Grant (T32CA009476). WA, BCM and NZ were recipients of UNMC graduate assistantships.

## REFERENCES

1. Chen L, Flies DB. Molecular mechanisms of T cell co-stimulation and co-inhibition. *Nature reviews. Immunology*. 2013; 13:227–242.
2. LaSalle JM, Hafler DA. T cell anergy. *FASEB journal*. 1994; 8:601–608.
3. Sharma P, Allison JP. Immune checkpoint targeting in cancer therapy: toward combination strategies with curative potential. *Cell*. 2015; 161:205–214.
4. Topalian SL, Taube JM, Anders RA, Pardoll DM. Mechanism-driven biomarkers to guide immune checkpoint blockade in cancer therapy. *Nature reviews. Cancer*. 2016; 16:275–287.
5. Loeser S, Penninger JM. Regulation of peripheral T cell tolerance by the E3 ubiquitin ligase Cbl-b. *Seminars in immunology*. 2007; 19:206–214.
6. Thien CB, Langdon WY. c-Cbl: a regulator of T cell receptor-mediated signalling. *Immunology and cell biology*. 1998; 76:473–482.
7. Thien CB, Blystad FD, Zhan Y, Lew AM, Voigt V, Andoniou CE, Langdon WY. Loss of c-Cbl RING finger function results in high-intensity TCR signaling and thymic deletion. *The EMBO journal*. 2005; 24:3807–3819.
8. Dou H, Buetow L, Hock A, Sibbet GJ, Vousden KH, Huang DT. Structural basis for autoinhibition and phosphorylation-dependent activation of c-Cbl. *Nature structural & molecular biology*. 2012; 19:184–192.
9. Fang D, Liu YC. Proteolysis-independent regulation of PI3K by Cbl-b-mediated ubiquitination in T cells. *Nature immunology*. 2001; 2:870–875.
10. Tang Q, Subudhi SK, Henriksen KJ, Long CG, Vives F, Bluestone JA. The Src family kinase Fyn mediates signals induced by TCR antagonists. *Journal of immunology*. 2002; 168:4480–4487.
11. Zhang W, Shao Y, Fang D, Huang J, Jeon MS, Liu YC. Negative regulation of T cell antigen receptor-mediated Crk-L-C3G signaling and cell adhesion by Cbl-b. *The Journal of biological chemistry*. 2003; 278:23978–23983.
12. Rao N, Ghosh AK, Douillard P, Andoniou CE, Zhou P, Band H. An essential role of ubiquitination in Cbl-mediated negative regulation of the Src-family kinase Fyn. *Signal transduction*. 2002; 2:29–39.
13. Rao N, Miyake S, Reddi AL, Douillard P, Ghosh AK, Dodge IL, Zhou P, Fernandes ND, Band H. Negative regulation of Lck by Cbl ubiquitin ligase. *Proceedings of the National Academy of Sciences of the United States of America*. 2002; 99:3794–3799.
14. Thien CB, Langdon WY. Cbl: many adaptations to regulate protein tyrosine kinases. *Nature reviews. Molecular cell biology*. 2001; 2:294–307.
15. Chiang YJ, Kole HK, Brown K, Naramura M, Fukuhara S, Hu RJ, Jang IK, Gutkind JS, Shevach E, Gu H. Cbl-b regulates the CD28 dependence of T-cell activation. *Nature*. 2000; 403:216–220.
16. Krawczyk C, Bachmaier K, Sasaki T, Jones RG, Snapper SB, Bouchard D, Kozieradzki I, Ohashi PS, Alt FW, Penninger JM. Cbl-b is a negative regulator of receptor clustering and raft aggregation in T cells. *Immunity*. 2000; 13:463–473.
17. Jeon MS, Atfield A, Venuprasad K, Krawczyk C, Sarao R, Elly C, Yang C, Arya S, Bachmaier K, Su L, Bouchard D, Jones R, Gronski M, et al. Essential role of the E3 ubiquitin ligase Cbl-b in T cell anergy induction. *Immunity*. 2004; 21:167–177.
18. Heissmeyer V, Macian F, Im SH, Varma R, Feske S, Venuprasad K, Gu H, Liu YC, Dustin ML, Rao A. Calcineurin imposes T cell unresponsiveness through targeted proteolysis of signaling proteins. *Nature immunology*. 2004; 5:255–265.
19. Bachmaier K, Krawczyk C, Kozieradzki I, Kong YY, Sasaki T, Oliveira-dos-Santos A, Mariathasan S, Bouchard D, Wakeham A, Itie A, Le J, Ohashi PS, Sarosi I, et al. Negative regulation of lymphocyte activation and autoimmunity by the molecular adaptor Cbl-b. *Nature*. 2000; 403:211–216.
20. Chiang JY, Jang IK, Hodes R, Gu H. Ablation of Cbl-b provides protection against transplanted and spontaneous tumors. *The Journal of clinical investigation*. 2007; 117:1029–1036.
21. Lutz-Nicoladoni C, Wallner S, Stoitzner P, Pircher M, Gruber T, Wolf AM, Gastl G, Penninger JM, Baier G, Wolf D. Reinforcement of cancer immunotherapy by adoptive transfer of cblb-deficient CD8+ T cells combined with a DC vaccine. *Immunology and cell biology*. 2012; 90:130–134.

22. Hinterleitner R, Gruber T, Pfeifhofer-Obermair C, Lutz-Nicoladoni C, Tzankov A, Schuster M, Penninger JM, Loibner H, Lametschwandtner G, Wolf D, Baier G. Adoptive transfer of siRNA Cblb-silenced CD8<sup>+</sup> T lymphocytes augments tumor vaccine efficacy in a B16 melanoma model. *PLoS one*. 2012; 7:e44295.
23. Stromnes IM, Blattman JN, Tan X, Jeevanjee S, Gu H, Greenberg PD. Abrogating Cbl-b in effector CD8<sup>(+)</sup> T cells improves the efficacy of adoptive therapy of leukemia in mice. *The Journal of clinical investigation*. 2010; 120:3722–3734.
24. Paolino M, Choidas A, Wallner S, Pranjic B, Uribealago I, Loeser S, Jamieson AM, Langdon WY, Ikeda F, Fededa JP, Cronin SJ, Nitsch R, Schultz-Fademrecht C, et al. The E3 ligase Cbl-b and TAM receptors regulate cancer metastasis via natural killer cells. *Nature*. 2014; 507:508–512.
25. Hinterleitner R, Gruber T, Pfeifhofer-Obermair C, Lutz-Nicoladoni C, Tzankov A, Schuster M, Penninger JM, Loibner H, Lametschwandtner G, Wolf D, Baier G. Adoptive transfer of siRNA Cblb-silenced CD8<sup>+</sup> T lymphocytes augments tumor vaccine efficacy in a B16 melanoma model. *PLoS one*. 2012; 7:e44295.
26. Oguro S, Ino Y, Shimada K, Hatanaka Y, Matsuno Y, Esaki M, Nara S, Kishi Y, Kosuge T, Hiraoka N. Clinical significance of tumor-infiltrating immune cells focusing on BTLA and Cbl-b in patients with gallbladder cancer. *Cancer science*. 2015; 106:1750–1760.
27. Naramura M, Kole HK, Hu RJ, Gu H. Altered thymic positive selection and intracellular signals in Cbl-deficient mice. *Proceedings of the National Academy of Sciences of the United States of America*. 1998; 95:15547–15552.
28. Murphy MA, Schnall RG, Venter DJ, Barnett L, Bertocello I, Thien CB, Langdon WY, Bowtell DD. Tissue hyperplasia and enhanced T-cell signalling via ZAP-70 in c-Cbl-deficient mice. *Molecular and cellular biology*. 1998; 18:4872–4882.
29. Balagopalan L, Barr VA, Sommers CL, Barda-Saad M, Goyal A, Isakowitz MS, Samelson LE. c-Cbl-mediated regulation of LAT-nucleated signaling complexes. *Molecular and cellular biology*. 2007; 27:8622–8636.
30. Naramura M, Jang IK, Kole H, Huang F, Haines D, Gu H. c-Cbl and Cbl-b regulate T cell responsiveness by promoting ligand-induced TCR down-modulation. *Nature immunology*. 2002; 3:1192–1199.
31. Huang F, Kitaura Y, Jang I, Naramura M, Kole HH, Liu L, Qin H, Schlissel MS, Gu H. Establishment of the major compatibility complex-dependent development of CD4<sup>+</sup> and CD8<sup>+</sup> T cells by the Cbl family proteins. *Immunity*. 2006; 25:571–581.
32. Duan L, Miura Y, Dimri M, Majumder B, Dodge IL, Reddi AL, Ghosh A, Fernandes N, Zhou P, Mullane-Robinson K, Rao N, Donoghue S, Rogers RA, et al. Cbl-mediated ubiquitylation is required for lysosomal sorting of epidermal growth factor receptor but is dispensable for endocytosis. *The Journal of biological chemistry*. 2003; 278:28950–28960.
33. Ahmad G, Mohapatra BC, Schulte NA, Nadeau SA, Luan H, Zutshi N, Tom E, Ortega-Cava C, Tu C, Sanada M, Ogawa S, Toews ML, Band V, et al. Cbl-family ubiquitin ligases and their recruitment of CIN85 are largely dispensable for epidermal growth factor receptor endocytosis. *The international journal of biochemistry & cell biology*. 2014; 57:123–134.
34. Duan L, Raja SM, Chen G, Virmani S, Williams SH, Clubb RJ, Mukhopadhyay C, Rainey MA, Ying G, Dimri M, Chen J, Reddi AL, Naramura M, et al. Negative regulation of EGFR-Vav2 signaling axis by Cbl ubiquitin ligase controls EGF receptor-mediated epithelial cell adherens junction dynamics and cell migration. *The Journal of biological chemistry*. 2011; 286:620–633.
35. Ferron SR, Pozo N, Laguna A, Aranda S, Porlan E, Moreno M, Fillat C, de la Luna S, Sanchez P, Arbones ML, Farinas I. Regulated segregation of kinase Dyrk1A during asymmetric neural stem cell division is critical for EGFR-mediated biased signaling. *Cell stem cell*. 2010; 7:367–379.
36. Naramura M, Nandwani N, Gu H, Band V, Band H. Rapidly fatal myeloproliferative disorders in mice with deletion of Casitas B-cell lymphoma (Cbl) and Cbl-b in hematopoietic stem cells. *Proceedings of the National Academy of Sciences of the United States of America*. 2010; 107: 16274–16279.
37. An W, Nadeau SA, Mohapatra BC, Feng D, Zutshi N, Storck MD, Arya P, Talmadge JE, Meza JL, Band V, Band H. Loss of Cbl and Cbl-b ubiquitin ligases abrogates hematopoietic stem cell quiescence and sensitizes leukemic disease to chemotherapy. *Oncotarget*. 2015; 6:10498–10509. doi: 10.18632/oncotarget.3403.
38. Caligiuri MA, Briesewitz R, Yu J, Wang L, Wei M, Amoczký KJ, Marburger TB, Wen J, Perrotti D, Bloomfield CD, Whitman SP. Novel c-CBL and CBL-b ubiquitin ligase mutations in human acute myeloid leukemia. *Blood*. 2007; 110:1022–1024.
39. Grand FH, Hidalgo-Curtis CE, Ernst T, Zoi K, Zoi C, McGuire C, Kreil S, Jones A, Score J, Metzgeroth G, Oscier D, Hall A, Brandts C, et al. Frequent CBL mutations associated with 11q acquired uniparental disomy in myeloproliferative neoplasms. *Blood*. 2009; 113:6182–6192.
40. Makishima H, Cazzolli H, Szpurka H, Dunbar A, Tiu R, Huh J, Muramatsu H, O’Keefe C, Hsi E, Paquette RL, Kojima S, List AF, Sekeres MA, et al. Mutations of e3 ubiquitin ligase cbl family members constitute a novel common pathogenic lesion in myeloid malignancies. *Journal of clinical oncology*. 2009; 27:6109–6116.
41. Shiba N, Kato M, Park MJ, Sanada M, Ito E, Fukushima K, Sako M, Arakawa H, Ogawa S, Hayashi Y. CBL mutations in juvenile myelomonocytic leukemia and pediatric myelodysplastic syndrome. *Leukemia*. 2010; 24:1090–1092.
42. Nadeau S, An W, Palermo N, Feng D, Ahmad G, Dong L, Borgstahl GE, Natarajan A, Naramura M, Band V, Band

- H. Oncogenic Signaling by Leukemia-Associated Mutant Cbl Proteins. *Biochemistry and analytical biochemistry*. 2012:7921.
43. Niemeyer CM, Kang MW, Shin DH, Furlan I, Erlacher M, Bunin NJ, Bunda S, Finklestein JZ, Sakamoto KM, Gorr TA, Mehta P, Schmid I, Kropshofer G, et al. Germline CBL mutations cause developmental abnormalities and predispose to juvenile myelomonocytic leukemia. *Nature genetics*. 2010; 42:794–800.
  44. Dunbar AJ, Gondek LP, O’Keefe CL, Makishima H, Rataul MS, Szpurka H, Sekeres MA, Wang XF, McDevitt MA, Maciejewski JP. 250K single nucleotide polymorphism array karyotyping identifies acquired uniparental disomy and homozygous mutations, including novel missense substitutions of c-Cbl, in myeloid malignancies. *Cancer research*. 2008; 68:10349–10357.
  45. Sanada M, Suzuki T, Shih LY, Otsu M, Kato M, Yamazaki S, Tamura A, Honda H, Sakata-Yanagimoto M, Kumano K, Oda H, Yamagata T, Takita J, et al. Gain-of-function of mutated C-CBL tumour suppressor in myeloid neoplasms. *Nature*. 2009; 460:904–908.
  46. Rathinam C, Thien CB, Flavell RA, Langdon WY. Myeloid leukemia development in c-Cbl RING finger mutant mice is dependent on FLT3 signaling. *Cancer cell*. 2010; 18:341–352.
  47. Zhang L, Teng Y, Fan Y, Wang Y, Li W, Shi J, Ma Y, Li C, Shi X, Qu X, Liu Y. The E3 ubiquitin ligase Cbl-b improves the prognosis of RANK positive breast cancer patients by inhibiting RANKL-induced cell migration and metastasis. *Oncotarget*. 2015; 6:22918–22933. doi: 10.18632/oncotarget.4382.
  48. Kang JM, Park S, Kim SJ, Hong HY, Jeong J, Kim HS, Kim SJ. CBL enhances breast tumor formation by inhibiting tumor suppressive activity of TGF-beta signaling. *Oncogene*. 2012; 31:5123–5131.
  49. Sohn HW, Gu H, Pierce SK. Cbl-b negatively regulates B cell antigen receptor signaling in mature B cells through ubiquitination of the tyrosine kinase Syk. *The Journal of experimental medicine*. 2003; 197:1511–1524.
  50. Hirasaka K, Kohno S, Goto J, Furochi H, Mawatari K, Harada N, Hosaka T, Nakaya Y, Ishidoh K, Obata T, Ebina Y, Gu H, Takeda S, et al. Deficiency of Cbl-b gene enhances infiltration and activation of macrophages in adipose tissue and causes peripheral insulin resistance in mice. *Diabetes*. 2007; 56:2511–2522.
  51. Abe T, Hirasaka K, Kagawa S, Kohno S, Ochi A, Utsunomiya K, Sakai A, Ohno A, Teshima-Kondo S, Okumura Y, Oarada M, Maekawa Y, Terao J, et al. Cbl-b is a critical regulator of macrophage activation associated with obesity-induced insulin resistance in mice. *Diabetes*. 2013; 62:1957–1969.
  52. Gustin SE, Thien CB, Langdon WY. Cbl-b is a negative regulator of inflammatory cytokines produced by IgE-activated mast cells. *Journal of immunology*. 2006; 177:5980–5989.
  53. Choi EY, Orlova VV, Fagerholm SC, Nurmi SM, Zhang L, Ballantyne CM, Gahmberg CG, Chavakis T. Regulation of LFA-1-dependent inflammatory cell recruitment by Cbl-b and 14-3-3 proteins. *Blood*. 2008; 111:3607–3614.
  54. Bachmaier K, Toya S, Gao X, Triantafyllou T, Garrean S, Park GY, Frey RS, Vogel S, Minshall R, Christman JW, Tiruppathi C, Malik AB. E3 ubiquitin ligase Cblb regulates the acute inflammatory response underlying lung injury. *Nature medicine*. 2007; 13: 920–926.
  55. Kojo S, Elly C, Harada Y, Langdon WY, Kronenberg M, Liu YC. Mechanisms of NKT cell anergy induction involve Cbl-b-promoted monoubiquitination of CARMA1. *Proceedings of the National Academy of Sciences of the United States of America*. 2009; 106:17847–17851.
  56. Muzumdar MD, Tasic B, Miyamichi K, Li L, Luo L. A global double-fluorescent Cre reporter mouse. *Genesis*. 2007; 45:593–605.
  57. Godfrey DI, Kennedy J, Suda T, Zlotnik A. A developmental pathway involving four phenotypically and functionally distinct subsets of CD3-CD4-CD8- triple-negative adult mouse thymocytes defined by CD44 and CD25 expression. *Journal of immunology*. 1993; 150:4244–4252.
  58. Seita J, Weissman IL. Hematopoietic stem cell: self-renewal versus differentiation. *Wiley interdisciplinary reviews. Systems biology and medicine*. 2010; 2:640–653.
  59. Yi Z, Stunz LL, Bishop GA. TNF receptor associated factor 3 plays a key role in development and function of invariant natural killer T cells. *The Journal of experimental medicine*. 2013; 210:1079–1086.
  60. Hsu FC, Pajerowski AG, Nelson-Holte M, Sundsbak R, Shapiro VS. NKAP is required for T cell maturation and acquisition of functional competency. *The Journal of experimental medicine*. 2011; 208:1291–1304.
  61. Johnson DJ, Pao LI, Dhanji S, Murakami K, Ohashi PS, Neel BG. Shp1 regulates T cell homeostasis by limiting IL-4 signals. *The Journal of experimental medicine*. 2013; 210:1419–1431.
  62. Buckley MW, Trampont PC, Arandjelovic S, Fond AM, Juncadella IJ, Ravichandran KS. ShcA regulates late stages of T cell development and peripheral CD4+ T cell numbers. *Journal of immunology*. 2015; 194:1665–1676.
  63. Hsu FC, Shapiro MJ, Chen MW, McWilliams DC, Seaburg LM, Tangen SN, Shapiro VS. Immature recent thymic emigrants are eliminated by complement. *Journal of immunology*. 2014; 193:6005–6015.
  64. Jost NH, Abel S, Hutzler M, Sparwasser T, Zimmermann A, Roers A, Muller W, Klopffleisch R, Hengel H, Westendorf AM, Buer J, Hansen W. Regulatory T cells and T-cell-derived IL-10 interfere with effective anti-cytomegalovirus immune response. *Immunology and cell biology*. 2014; 92:860–871.
  65. Uddin MN, Zhang Y, Harton JA, MacNamara KC, Avram D. TNF-alpha-dependent hematopoiesis following Bcl11b deletion in T cells restricts metastatic melanoma. *Journal of immunology*. 2014; 192:1946–1953.



66. Maraver A, Tadokoro CE, Badura ML, Shen J, Serrano M, Lafaille JJ. Effect of presenilins in the apoptosis of thymocytes and homeostasis of CD8+ T cells. *Blood*. 2007; 110:3218–3225.
67. Zhang Y, Rosenberg S, Wang H, Imtiyaz HZ, Hou YJ, Zhang J. Conditional Fas-associated death domain protein (FADD): GFP knockout mice reveal FADD is dispensable in thymic development but essential in peripheral T cell homeostasis. *Journal of immunology*. 2005; 175:3033–3044.
68. Mycko MP, Ferrero I, Wilson A, Jiang W, Bianchi T, Trumpp A, MacDonald HR. Selective requirement for c-Myc at an early stage of V(alpha)14i NKT cell development. *Journal of immunology*. 2009; 182:4641–4648.
69. Wineman JP, Gilmore GL, Gritzmacher C, Torbett BE, Muller-Sieburg CE. CD4 is expressed on murine pluripotent hematopoietic stem cells. *Blood*. 1992; 80:1717–1724.
70. Ishida A, Zeng H, Ogawa M. Expression of lineage markers by CD34+ hematopoietic stem cells of adult mice. *Experimental hematology*. 2002; 30:361–365.
71. Kovacic JC, Gupta R, Lee AC, Ma M, Fang F, Tolbert CN, Walts AD, Beltran LE, San H, Chen G, St Hilaire C, Boehm M. Stat3-dependent acute Rantes production in vascular smooth muscle cells modulates inflammation following arterial injury in mice. *The Journal of clinical investigation*. 2010; 120:303–314.
72. Zhang J, Salojin K, Delovitch TL. Sequestration of CD4-associated Lck from the TCR complex may elicit T cell hyporesponsiveness in nonobese diabetic mice. *Journal of immunology*. 1998; 160:1148–1157.
73. Lakso M, Pichel JG, Gorman JR, Sauer B, Okamoto Y, Lee E, Alt FW, Westphal H. Efficient *in vivo* manipulation of mouse genomic sequences at the zygote stage. *Proceedings of the National Academy of Sciences of the United States of America*. 1996; 93:5860–5865.
74. Yui MA, Rothenberg EV. Developmental gene networks: a triathlon on the course to T cell identity. *Nature reviews. Immunology*. 2014; 14:529–545.
75. Panigada M, Sturniolo T, Besozzi G, Boccieri MG, Sinigaglia F, Grassi GG, Grassi F. Identification of a promiscuous T-cell epitope in *Mycobacterium tuberculosis* Mce proteins. *Infection and immunity*. 2002; 70:79–85.
76. El Chami N, Ikhlef F, Kaszas K, Yakoub S, Tabone E, Siddeek B, Cunha S, Beaudoin C, Morel L, Benahmed M, Regnier DC. Androgen-dependent apoptosis in male germ cells is regulated through the proto-oncoprotein Cbl. *The Journal of cell biology*. 2005; 171:651–661.
77. Molero JC, Jensen TE, Withers PC, Couzens M, Herzog H, Thien CB, Langdon WY, Walder K, Murphy MA, Bowtell DD, James DE, Cooney GJ. c-Cbl-deficient mice have reduced adiposity, higher energy expenditure, and improved peripheral insulin action. *The Journal of clinical investigation*. 2004; 114:1326–1333.
78. Rafiq K, Kolpakov MA, Seqqat R, Guo J, Guo X, Qi Z, Yu D, Mohapatra B, Zutshi N, An W, Band H, Sanjay A, Houser SR, et al. c-Cbl inhibition improves cardiac function and survival in response to myocardial ischemia. *Circulation*. 2014; 129:2031–2043.
79. Rathinam C, Thien CB, Langdon WY, Gu H, Flavell RA. The E3 ubiquitin ligase c-Cbl restricts development and functions of hematopoietic stem cells. *Genes & development*. 2008; 22:992–997.
80. Liu P, Jenkins NA, Copeland NG. A highly efficient recombineering-based method for generating conditional knockout mutations. *Genome research*. 2003; 13:476–484.
81. Seita J, Weissman IL. Hematopoietic stem cell: self-renewal versus differentiation. *Wiley interdisciplinary reviews. Systems biology and medicine*. 2010; 2:640–653.
