# Supplementary material for: A novel CBL-Bflox/flox mouse model allows tissue-selective fully conditional CBL/CBL-B double-knockout: CD4-Cre mediated CBL/CBL-B deletion occurs in both T-cells and hematopoietic stem cells
Source: PubMed Central journal article supplement (PMC5239462; doi:10.18632/oncotarget.9812), 2016-06-03
Supplement: oncotarget-07-51107-s001.pdf [file oncotarget-07-51107-s001.pdf]

## A novel *CBL-B<sup>flox/flox</sup>* mouse model allows tissue-selective fully conditional *CBL/CBL-B* double-knockout: CD4-Cre mediated *CBL/CBL-B* deletion occurs in both T-cells and hematopoietic stem cells

### Supplementary Materials

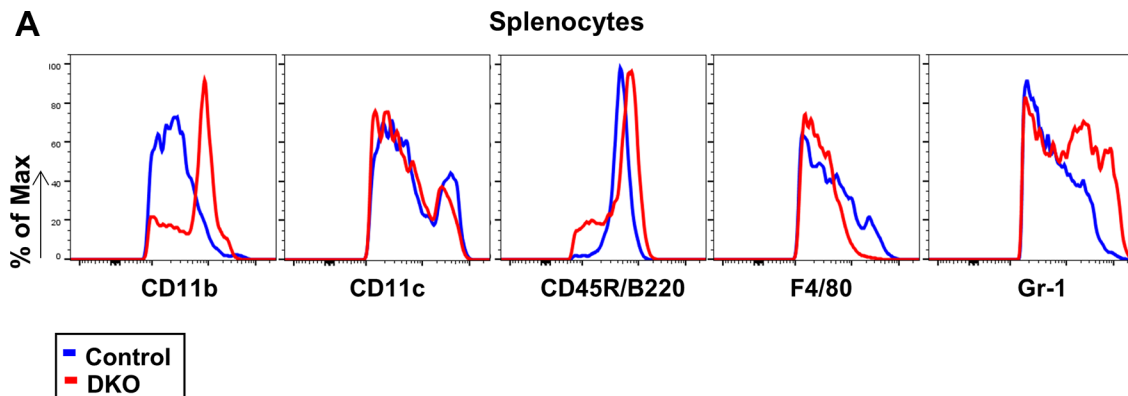

**Supplementary Figure S1: Splenic Non-T cell lineages were impacted by CD4-Cre.** (A) Representative histograms for FACS analysis of non-T cell marker expression in the spleen of Control and DKO mice.

### Supplementary Table S1: Genotypes of mice used in this paper

| Strain designation    | Genotype                                                                              |
|-----------------------|---------------------------------------------------------------------------------------|
| WT                    | C57/B6                                                                                |
| Control               | <i>CBL<sup>flox/flox</sup> CBL-B<sup>flox/flox</sup></i>                              |
| CBL/CBL-B DKO         | <i>CBL<sup>flox/flox</sup> CBL-B<sup>flox/flox</sup> CD4-Cre<sup>Tg/0</sup></i>       |
| CBL/CBL-B DKO mT/mGFP | <i>CBL<sup>flox/flox</sup> CBL-B<sup>flox/flox</sup> CD4-Cre<sup>Tg/0</sup> mT/mG</i> |

### Supplementary Table S2: Genotyping primers

| Target Allele     | Forward 5'-3'                       | Reverse 5'-3'                 |
|-------------------|-------------------------------------|-------------------------------|
| CBL floxed        | GTGGTGGCTTGCAATTATAATCCTACCACT-TAGG | GTTTGAGATGTCTGGCTGTGTACAC-GCG |
| CBL-B floxed      | GGCAGAACCACTGAGACACATTTA            | GGCTGCCAAACTGCTACCCAGGAG      |
| CD4-Cre           | GCGGTCTGGCAGTAAAACTATC              | GTGAAACAGCATTGCTGTCACTT       |
| Rosa 26 – mT/mGFP | CTCTGCTGCCTCCTGGCTTCT               | TCAATGGGCGGGGGTTCGTT          |

**Supplementary Table S3: Primers used for quantitative real-time PCR**

| <b>Target</b> | <b>Forward 5'-3'</b>           | <b>Reverse 5'-3'</b>           |
|---------------|--------------------------------|--------------------------------|
| <b>CBL</b>    | <b>AGCTGATGCTGCCGAATTT</b>     | <b>TTGCAGGTCAGATCAATAGTGG</b>  |
| <b>CBL-B</b>  | <b>GGAGCTTTTTGCACGGACTA</b>    | <b>TGCATCCTGAATAGCATCAA</b>    |
| <b>CD4</b>    | <b>GAGAGTCAGCGGAGTTCTC</b>     | <b>CTCACAGGTCAAAGTATTGTTG</b>  |
| <b>LCK</b>    | <b>CGCATGGTGAGACCTGACAA</b>    | <b>TCCGAAGGTAGTCAAACGTGG</b>   |
| <b>CD3</b>    | <b>TGCCTCAGAAGCATGATAAGC</b>   | <b>GCCCAGAGTGATACAGATGTCAA</b> |
| <b>GAPDH</b>  | <b>CCTGGAGAAACCTGCCAAGTATG</b> | <b>AGAGTGGGAGTTGCTGTTGAAGT</b> |
